1 **Proximity labeling reveals a new *in vivo* network of interactors for the histone demethylase**  
2 **KDM5**

3

4 Matanel Yheskel<sup>1</sup>, Simone Sidoli<sup>2</sup>, and Julie Secombe<sup>1,3,4</sup>

5

6

7

8 <sup>1</sup> Department of Genetics, Albert Einstein College of Medicine, Bronx, New York, United States  
9 of America.

10

11 <sup>2</sup> Department of Biochemistry, Albert Einstein College of Medicine, Bronx, New York, United  
12 States of America.

13

14 <sup>3</sup> Dominick P. Purpura Department of Neuroscience, Albert Einstein College of Medicine, Bronx,  
15 New York, United States of America.

16

17

18 <sup>4</sup> Lead contact and corresponding author: [julie.secombe@einsteinmed.edu](mailto:julie.secombe@einsteinmed.edu)

19

20 Running title: KDM5-interacting proteins identified using proximity labeling

21

22

23 **Abstract**

24 Keywords: KDM5, histone demethylase, TurboID, proximity labeling, mass spectrometry,  
25 chromatin modifiers, insulators

26 **Background**

27 KDM5 family proteins are multi-domain regulators of transcription that when dysregulated  
28 contribute to cancer and intellectual disability. KDM5 proteins can regulate transcription through  
29 their histone demethylase activity in addition to demethylase-independent gene regulatory  
30 functions that remain less characterized. To expand our understanding of the mechanisms that  
31 contribute to KDM5-mediated transcription regulation, we used TurboID proximity labeling to  
32 identify KDM5-interacting proteins.

33 **Results**

34 Using *Drosophila melanogaster*, we enriched for biotinylated proteins from KDM5-TurboID-  
35 expressing adult heads using a newly generated control for DNA-adjacent background in the form  
36 of dCas9:TurboID. Mass spectrometry analyses of biotinylated proteins identified both known and  
37 novel candidate KDM5 interactors, including members of the SWI/SNF and NURF chromatin  
38 remodeling complexes, the NSL complex, Mediator, and several insulator proteins.

39 **Conclusions**

40 Combined, our data shed new light on potential demethylase-independent activities of KDM5. In  
41 the context of KDM5 dysregulation, these interactions may play key roles in the alteration of  
42 evolutionarily conserved transcriptional programs implicated in human disorders.

43

44

## 45 **Background**

46 Lysine demethylase 5 (KDM5) family proteins are multidomain transcriptional regulators  
47 able to recognize and enzymatically modify chromatin.(1,2) The best characterized function of  
48 KDM5 proteins is their histone demethylase activity, which cleaves a chromatin mark that is found  
49 at most active promoters, trimethylated lysine 4 on histone H3 (H3K4me3).(1,3–6) KDM5 proteins  
50 are evolutionarily conserved, with four paralogous genes in mammals encoding KDM5A-D, while  
51 animals with smaller genomes such as nematodes and flies possess a single *kdm5* gene. The  
52 importance of KDM5 function is emphasized by the observation that changes to the expression  
53 of this family of proteins is associated with two clinical outcomes: cancer and intellectual disability  
54 (ID).(7–9) KDM5A and KDM5B are amplified or overexpressed in a range of cancers, including  
55 breast, ovarian, skin, and lung.(8,10–13) KDM5A/B appear to play several roles in tumorigenesis,  
56 including promoting cell cycle progression and regulating the metabolism of cancer stem  
57 cells.(14–16) In contrast to the gain of function seen in cancer cells, loss of function variants in  
58 the autosomal paralogs KDM5A, KDM5B, and the X-linked KDM5C have been observed in  
59 individuals with intellectual disability.(17–21) KDM5 proteins have an evolutionarily conserved  
60 role in regulating critical gene expression programs in neurons as evidenced by morphological  
61 and functional neuronal phenotypes in KDM5B and KDM5C knockout mice.(21–23) Similarly, flies  
62 and nematodes with *kdm5* mutations display altered neuroanatomical development and  
63 neurotransmission. (24–26)

64

65 KDM5 catalytic function is mediated by the joint activity of the Jumonji N (JmjN) and JmjC  
66 domains and is classically thought to result in transcriptional repression. In addition, KDM5  
67 proteins possess other potential gene regulatory domains, including plant homeodomain domain  
68 (PHD) motifs that can recognize H3K4me2/3 or H3K4me0, and a potential DNA binding A/T  
69 interaction domain (ARID).(27–32) These binding domains likely function in-concert with the

70 histone demethylase activity of KDM5 by, for example, recruiting it to target promoters or altering  
71 enzymatic activity through the activity of individual or combinations of accessory domains.  
72 Conversely, non-enzymatic functions of these domains and/or other motifs of KDM5 that have no  
73 currently known function, such as the C<sub>5</sub>HC<sub>2</sub> domain, could regulate transcription through distinct  
74 mechanisms. There is ample evidence that KDM5 proteins can regulate transcription  
75 independently of their demethylase activity. For instance, KDM5 is essential for viability in flies in  
76 a manner that is independent of its histone demethylase activity.(31,33) In addition, both  
77 demethylase-dependent and independent functions of KDM5 are critical for *Drosophila* neuronal  
78 development and function.(24,25) Consistent with this, some missense alleles of KDM5C  
79 observed in individuals with intellectual disability diminish its enzymatic activity, while others do  
80 not.(34–37) Similarly, demethylase dependent and independent activities of KDM5 proteins are  
81 likely to be important for their contributions to the etiology of and spread of cancers.(38,39) For  
82 example, KDM5B demethylase-independent functions in breast cancer promote metastatic  
83 potential to the lung.(38,39) Thus, even though KDM5 proteins derive their name from their  
84 enzymatic function, other conserved motifs contribute to their gene regulatory activities, although  
85 these activities remain much less characterized.

86

87 Understanding the repertoire of gene regulatory mechanisms utilized by KDM5 family proteins  
88 requires a comprehensive understanding of the proteins they can interact with. Traditional  
89 immunoprecipitation coupled with mass spectrometry (IP-MS) approaches have been used to  
90 identify proteins that form complexes with KDM5 family proteins in both mammals and  
91 *Drosophila*.(6,40–45) These experiments have revealed several conserved interactions, most  
92 notably with histone deacetylase 1 (HDAC1) and other proteins known to associate with this  
93 chromatin modifier.(42,44) To expand our understanding of the proteins that function with KDM5  
94 to mediate its gene regulatory activities, we used TurboID-mediated proximity labeling.(46) This  
95 has been shown to be a powerful technique to identify weak or transient interactions that may

96 otherwise be disturbed during the process of traditional IP experiments.(46–53) This technique  
97 takes advantage of the promiscuous biotin ligase activity of TurboID, which results in the  
98 biotinylation of lysine residues within 10 nm of its active site. When expressed as a chimeric fusion  
99 to a protein of interest, interacting proteins will be biotin-labeled.(46,54) Covalently modified  
100 proteins are then recovered with streptavidin beads and prepared for liquid chromatography-  
101 tandem mass spectrometry (LC-MS/MS). By expressing KDM5 that was N- or C-terminally tagged  
102 with TurboID *in vivo*, we recovered about half of previously identified interactions in *Drosophila*,  
103 and almost all interactions known to be conserved in mammalian cells, clearly demonstrating the  
104 robustness of this technique. Furthermore, we have discovered a novel interactome for KDM5  
105 that suggests roles in the function of the switch/sucrose non-fermentable (SWI/SNF), non-specific  
106 lethal (NSL), nucleosome remodeling factor (NURF), and Mediator complexes, in addition to  
107 chromatin insulation.

108

## 109 **Results**

### 110 **Chimeric TurboID-KDM5 proteins are functional and broadly biotinylate**

111 To identify KDM5 interactors *in vivo*, we created constructs in which KDM5 was N- or C-terminally  
112 tagged with TurboID to maximally identify proteins that could function with KDM5. Because our  
113 long-term goal is to further develop our *Drosophila* model of KDM5-induced intellectual disability,  
114 we chose to carry out our TurboID studies using adult heads to enrich for neuronal tissue, using  
115 the general workflow shown in Fig 1A. Generating a TurboID system that closely mimics  
116 endogenous *kdm5* expression has been shown to be important for delivering more specific  
117 biotinylation compared to overexpression.(55) Based on our prior generation of a UASp-*kdm5*  
118 transgene that is expressed at approximately endogenous levels in somatic cells when crossed  
119 to a range of Gal4 drivers, we generated transgenic flies harboring HA-tagged UASp-  
120 *TurboID:kdm5* and UASp-*kdm5:TurboID* (Fig. 1B).(56) Therefore, we generated both N-terminal  
121 (NT-KDM5) and C-terminal (CT-KDM5) TurboID fusions of KDM5 to understand the full breadth

122 of its interactome and to highlight terminus-specific interactions. To test the functionality and  
123 expression of the chimeric KDM5-TurboID proteins, we expressed them ubiquitously in a *kdm5*<sup>140</sup>  
124 null mutant background.(33) Western blot analysis using adult heads showed that NT-KDM5 and  
125 CT-KDM5 were expressed at levels similar to those observed from an endogenously HA-tagged  
126 KDM5 (Fig. 1C). Importantly, N- and C-terminally tagged KDM5 proteins were able to restore  
127 viability to *kdm5*<sup>140</sup> null mutant flies, which normally die prior to adulthood (Fig. 1D).(33) Tagging  
128 KDM5 with TurboID therefore does not interfere with its essential functions. Flies in which  
129 TurboID-KDM5 was the only source of KDM5 (*kdm5*<sup>140</sup>;Ubi-Gal4>*TurboID:kdm5*) were used for  
130 all subsequent experiments to maximize the number of interactors identified.

131

### 132 **Determining the proper controls to identify the KDM5 proximitome**

133 To confidently identify proteins that function with KDM5, appropriate controls are critical.  
134 Due to the novelty of the technique, there are no standard controls for proximity labeling  
135 experiments. Many studies simply enrich over endogenous biotinylation and bead  
136 background.(57–60) Other studies expressed forms of TurboID alone that were localized to the  
137 specific cellular compartment that the protein of interest resided, such as the cellular  
138 membrane.(46,49,50) As a non-TurboID-expressing wild-type control with a similar genetic  
139 background, we used a fly strain in which endogenous *kdm5* is removed and HA-tagged KDM5  
140 is expressed using its endogenous promoter from a transgene inserted at the same locus as the  
141 TurboID constructs (*kdm5*<sup>140</sup>;*gkdm5*<sup>WT</sup>). We will refer to this genotype as control. We also  
142 generated a transgene able to express nuclear localized, HA-tagged, TurboID alone using the  
143 same UAS promoter used for CT-*kdm5* and NT-*kdm5*, in an effort to assay general nuclear  
144 background (Fig. 1B). To compare the levels of TurboID alone to TurboID-KDM5 we expressed  
145 these transgenes using Ubi-Gal4 in a wild-type and *kdm5*<sup>140</sup> background, respectively. Anti-HA  
146 western blot from adult heads showed significantly higher levels of expression for TurboID alone,  
147 possibly creating high levels of background biotinylation in this strain (Fig. 1C). Because biotin is

148 essential for animal viability and thus included in the standard fly food used for crosses and stock  
149 maintenance, we assessed the ability of all TurboID transgenes to biotinylate proteins when  
150 expressed using Ubi-Gal4 by probing with infrared-conjugated streptavidin. Compared to control  
151 flies, similar levels of biotin-conjugated proteins were observed in heads expressing TurboID, NT-  
152 KDM5 and CT-KDM5, demonstrating their ability to biotinylate *in vivo* (Fig 1C).

153  
154 To identify proteins preferentially biotinylated by NT-KDM5 and CT-KDM5 compared to  
155 control and TurboID alone, we carried out streptavidin-bead pulldowns in quadruplicate followed  
156 by LC-MS/MS. This experiment (experiment 1) identified a total of 1332 proteins, 476 of which  
157 are found in the nucleus where we have previously shown KDM5 to be localized.<sup>(25)</sup> Principal  
158 component analysis (PCA) of normalized nuclear protein abundances showed that TurboID alone,  
159 NT-KDM5, and CT-KDM5 clustered together, but were distinct from controls (Fig S1A). We  
160 therefore compared the proteins identified in NT-KDM5 and CT-KDM5 to control heads which  
161 revealed enrichment of 172 and 184 proteins, respectively, using a *p*-value cutoff of 0.05 (Fig  
162 S1B, C; Table S1). 136 proteins were commonly enriched by N- and C-terminally tagged KDM5,  
163 suggesting that we can robustly detect proteins in proximity to KDM5 (Fig. S1D). To assess the  
164 quality of our data, we determined how many known KDM5 interactors were identified in our  
165 analyses. Fifteen proteins have been established to form a complex with *Drosophila* KDM5  
166 through IP-MS studies or targeted co-IP experiments (Table S2). Suggesting the robustness with  
167 which the TurboID approach identifies *bona fide* KDM5-associated proteins, 7 known interactors  
168 were identified by NT-KDM5 and 6 by CT-KDM5 (47% and 40%, respectively). We additionally  
169 assessed biotinylated protein enrichment of NT-KDM5 and CT-KDM5 compared to TurboID alone  
170 (Fig S1E, F). As expected, based on the increased level of expression of this protein compared  
171 to TurboID-tagged KDM5, a high level of background was observed in these flies. This resulted  
172 in fewer proteins being enriched in NT-KDM5 and CT-KDM5 (32 and 61, respectively), reduced  
173 overlap between the datasets, and a reduction in the number of known interactors identified (Fig

174 S1G, H). Interestingly, TurboID alone appears to show bias in its biotinylation of nuclear proteins,  
175 as comparing TurboID to control revealed significant enrichment of 199 proteins, a majority of  
176 which are involved in chromatin-mediated transcriptional regulation (Fig. S1I).

177

178 Because of concerns related to the use of TurboID alone as a control, we generated a  
179 transgene encoding an enzymatically inactive form of the Cas9 enzyme (dCas9) fused to an HA-  
180 tagged nuclear localized TurboID (UASp-*dCas9:TurboID*). The encoded dCas9:TurboID fusion  
181 protein is more similar in size to the KDM5 fusion proteins, being 194kDa and 235kDa,  
182 respectively, compared to 36kDa for TurboID alone. In addition, dCas9 can scan the DNA,  
183 potentially making this fusion an appropriate control for chromatin binding proteins such as KDM5  
184 by restricting biotinylation to DNA-adjacent proteins.<sup>(61)</sup> Ubi-Gal4-mediated expression of this  
185 transgene revealed that dCas9:TurboID was expressed at similar levels to the KDM5-TurboID  
186 fusion proteins and was able to biotinylate (Fig. 1C). Repeating the proximity labeling experiment,  
187 we carried out triplicate streptavidin-bead pulldowns from heads of control, TurboID,  
188 dCas9:TurboID, NT-KDM5 and CT-KDM5 flies (experiment 2). MS analyses identified 1,146  
189 proteins across all samples, 203 of which were nuclear. PCA from this second experiment showed  
190 that NT-KDM5 and CT-KDM5 clustered together, indicating that these datasets are more alike to  
191 each other than to any of the controls (Fig S2A). Like our first experiment, TurboID alone clustered  
192 with NT-KDM5 and CT-KDM5, and was distinct from control and dCas9:TurboID samples. Using  
193 these data, we compared NT-KDM5 and CT-KDM5 to control, dCas9:TurboID, and to TurboID  
194 alone (Table S3). Proteins enriched in the KDM5 samples compared to control gave similar results  
195 to those obtained in the first experiment (Fig 2A, B). Using control flies as reference, 82 proteins  
196 were identified using NT-KDM5 and 68 for CT-KDM5, with 61 of these proteins being identified in  
197 both datasets. Compared to TurboID alone, only 29 and 24 proteins were enriched for NT-KDM5  
198 and CT-KDM5, with 13 overlapping between the two datasets (Fig. 2C, D). Importantly, we find  
199 that comparing NT-KDM5 and CT-KDM5 with dCas9:TurboID yielded data very similar to that



200 seen using control animals, despite providing a higher biotinylation background. 66 and 59  
201 proteins were enriched in NT-KDM5 and CT-KDM5, respectively, with an overlap of 48 proteins  
202 (Fig. 2E, F).

203

204 To complete our characterization of dCas9:TurboID as a tool to identify enriched DNA-  
205 adjacent proteins, we compared these data to both TurboID alone and to control. Similar to data  
206 from the first experiment comparing TurboID and control, TurboID alone shows a preference for  
207 biotinylating a large number of chromatin-related proteins, even compared to dCas9:TurboID (Fig.  
208 S2B, C). Comparing dCas9:TurboID to control revealed enrichment in a relatively small number  
209 of proteins that were enriched for transcriptional-regulatory proteins consistent with the ability of  
210 dCas9:TurboID to biotinylate targets while scanning DNA (Fig. S2D). Confirming the challenges  
211 related to using TurboID alone, the consistency with which proteins were enriched in NT-KDM5  
212 or CT-KDM5 compared to TurboID alone was very low, with little agreement across experiments  
213 using a  $p$ -value cutoff  $<0.05$  or  $<0.1$  (Fig. S2E, F). Moreover, the number of previously identified  
214 interactors remained low in experiment 2 when comparing to TurboID alone, with only 5 and 3  
215 being identified in NT-KDM5 and CT-KDM5, respectively (Fig. S2G). We therefore suggest that  
216 endogenous biotinylation or dCas9:TurboID are superior to TurboID as controls for proximity  
217 labeling experiments where the protein of interest is nuclear-specific and DNA-adjacent.

218

### 219 **Proximity labeling identifies new potential KDM5 interacting complexes**

220 To build a high confidence list of proteins which interact with KDM5, we combined data from  
221 experiment 1 comparing NT-KDM5 and CT-KDM5 to control (2 datasets), and experiment 2 in  
222 which NT-KDM5 and CT-KDM5 were compared to control (2 datasets) as well as dCas9:TurboID  
223 (2 datasets). To do this, we began by filtering for enriched nuclear proteins across all six datasets  
224 using a  $p$ -value  $<0.1$ . We first filtered for proteins identified in at least two of six datasets. Then to  
225 include the possibility of terminus-exclusive interactors, we required that at each terminus proteins

226 had to be identified in 0 (exclusive to other terminus) or in 2 of 3 datasets (Fig. 2G). Demonstrating  
227 the power of this approach, this included 7 of the 15 (47%) known *Drosophila* KDM5 interactors  
228 (Fig. 2H, I). This ratio increased to 7 of 8 (88%) for those interactors that have been shown in both  
229 *Drosophila* and mammalian cells. In addition, we identified several proteins not previously been  
230 found to be *Drosophila* KDM5 interactors but have been purified with mammalian KDM5A,  
231 KDM5B, KDM5C and/or KDM5D. These included the nucleosome remodeler Mi-2, the chromatin  
232 assembly factor 1 (Caf1;Caf1-55), the acetyl-lysine binding protein Zmynd8 and the  
233 heterochromatin-associated protein HP1c (Fig 2H, I). (6,42,44) With these stringent filtering  
234 criteria, we identified a total of 87 proteins (Fig. 2I).

235  
236 Our proximity-labeling studies using Turbo-KDM5 revealed a broader interactome than  
237 previously described in the literature. To better understand the relationships between the proteins  
238 identified in our study, we generated a protein interaction map using Cytoscape and STRING (Fig.  
239 3A).(62,63) Gene Ontology (GO) analysis shows that many of these proteins have roles in the  
240 regulation of gene expression, chromatin modification, and chromatin remodeling (Fig. 3B). In  
241 addition to confirming the strong link between KDM5 and Sin3/HDAC1-containing complexes,  
242 these analyses also highlighted interactions with new protein complexes. Among these, we find  
243 proteins such as Boundary Element-Associated Factor of 32kDa (BEAF-32), Chromator (Chro),  
244 Putzig (Pzg), and Centrosomal protein 190kDa (Cp190) that function in regulating genomic  
245 architecture, suggesting a unstudied role for KDM5 in this process.(64–69) In addition, we  
246 identified proteins critical for forming the transcriptional pre-initiation complex (TPIC), which is  
247 consistent with the promoter-proximal binding of KDM5 proteins across species.(25,44,70–72)  
248 Using a recent cryo-EM structure of the human TPIC, we found that distinct surfaces interacted  
249 with KDM5, consistent with the specificity of biotinylation using TurboID-KDM5.(73) Specifically,  
250 three adjacent proteins in the mediator complex (MED1, MED14 and MED17) and three adjacent  
251 subunits of TFIID (Taf4, Taf6, and Taf9) were identified in our analyses (Fig. 3C). This suggests

252 that KDM5 may play a role in enhancer-promoter communications that regulate the transcriptional  
253 activity of target genes.

254

255 **KDM5 and newly identified interactors occupy overlapping genomic binding sites in**  
256 ***Drosophila* and human cells**

257 To further explore the relationship between KDM5 and newly identified interactors in  
258 *Drosophila*, we compared their genomic binding with those of interactors using publicly available  
259 ChIP-seq datasets. We used published KDM5 ChIP-seq data from whole adult flies to interrogate  
260 ChIP-Atlas as a means to identify datasets from any *Drosophila* cell type that significantly overlap  
261 (via permutation 100X).(74) We then overlapped these with our high confidence interactor (HCI)  
262 list to reveal a total of 27 overlapping datasets. 30 proteins in our interactor list had available data  
263 on ChIP Atlas. (Fig. 4A, B). These overlapping datasets included known interactors such as  
264 Sin3A, in addition to new interactors BEAF-32, the DNA replication-related element factor Dref  
265 and the NURF chromatin remodeler component Iswi. We analyzed the distribution of KDM5  
266 around interactor peaks and found that KDM5 seems to flank their binding sites (Fig. 4C-F). In  
267 these cases, the distribution of KDM5 appears to be bimodal while Sin3A, BEAF-32, Dref and  
268 Iswi have a single peak. This is likely due to KDM5 binding to promoter regions of adjacent genes  
269 with divergent promoters, leading to two peaks occurring within the 4kb range shown.(75) Sin3A,  
270 BEAF-32, Dref, and Iswi bind to a single site that overlaps with the region bound by KDM5 at one  
271 or both promoters. In contrast, KDM5 and female sterile (1) homeotic (*fs(1)h*), which encodes the  
272 ortholog of the acetyl-histone binding Brd2/Brd4, appear coincident (Fig. 4G). It is also notable  
273 that for Sin3A and Iswi, KDM5 does not co-localize across all binding sites (Fig. 4C, F). This could  
274 simply reflect binding differences in the cell types used for the ChIP-seq studies, or that specific  
275 promoter sub-types are co-occupied. A combined genome browser snapshot highlights the  
276 binding of KDM5, Sin3A, BEAF-32, Dref, Iswi and *fs(1)h* relative to each other, and also relative  
277 to the transcriptional start site (TSS; Fig. 4H; Fig. S3A).

278

279 To assess the extent to which our high confidence KDM5 interactors might be  
280 evolutionarily conserved, we investigated genomic co-occupancy in human cells. We first  
281 converted our 87 *Drosophila* high confidence interactors to their human ortholog(s), which  
282 resulted in a total of 138 proteins due to humans possessing multiple paralogous proteins for  
283 some *Drosophila* proteins (DIOPT v8.0 score > 8/15; Table S4).(76) Due to the strong link  
284 between KDM5B and breast cancer, and the wealth of ChIP-seq datasets available in cell lines  
285 derived from this cancer type, we used KDM5B data from MCF-7 cells for these analyses.(77)  
286 Using peaks called from this ChIP-seq data, we interrogated all available breast cancer cell line  
287 datasets again using ChIP-Atlas (100X permutation). This revealed that 26 candidate interactors  
288 had binding profiles that significantly overlapped with KDM5B binding (Fig. 4I, J). Interestingly,  
289 these included the KDM5 paralogs KDM5A and KDM5C, suggesting that there may be  
290 overlapping or redundant function for these proteins. Similar to our studies using *Drosophila*,  
291 some proteins identified were known interactors, such as SIN3A that is known show similar  
292 genomic binding to KDM5B (Fig. 4K).(78) Other proteins overlapped with our genomic binding  
293 studies in *Drosophila*, including Brd4 (fs(1)h), while other proteins were identified because  
294 datasets were available in human cells and not *Drosophila*. These included the Mediator subunit  
295 MED1 and the small ubiquitin-like modifier SUMO2 (*Drosophila* Sumo) (Fig. 4L, M). A combined  
296 genome browser emphasizes the colocalization of these proteins with KDM5B and their  
297 relationship to the TSS (Fig. 4N; Fig. S3B). These data also highlight the difference in genome  
298 size between *Drosophila* and human cells, with the greater distance between promoters resulting  
299 in a single binding peak. Combined, our data show that the high confidence KDM5 interactors  
300 identified in *Drosophila* may be important for the function of KDM5B and other KDM5 paralogs in  
301 mammalian cells.

302

303 **Identified KDM5 interactors are implicated in neurodevelopmental disorders**

304           Based on the association between genetic variants in KDM5A, KDM5B, and KDM5C and  
305 ID and autism spectrum disorder (ASD), KDM5-interactors could potentially be implicated in  
306 neurological disorders.(22,26,79–82) To examine this in more detail, we used the Simons  
307 Foundation Autism Research Initiative (SFARI) genes as an up-to-date source of genes with  
308 significant causal links to ASD.(83) The 1231 genes in this database are scored based on the  
309 level of confidence of association, with a score of 1 being the strongest link, in addition to whether  
310 ASD occurs as part of a syndrome (S). Using our list of 138 human ortholog-converted KDM5  
311 interactors, we found that 26 of these overlap with SFARI ASD-associated proteins ( $p=8e-08$ ; Fig.  
312 5A-B). Some of these proteins have clear links to each other, such as TAF4 and TAF6 that are  
313 components of TFIID, while others are associated with numerous other aspects of transcriptional  
314 regulation. To look more broadly into the link between KDM5 interactors and neurodevelopmental  
315 disorders, we used the Developmental Brain Disorder Gene Database (DBD) which is a curated  
316 list of genes implicated in disorders such as ID, ASD, attention deficit hyperactivity disorder  
317 (ADHD) and schizophrenia.(84) 24 human-converted orthologs represented in DBD have been  
318 shown to contribute to ID, ASD, ADHD, and Schizophrenia (Fig. 5C). Unsurprisingly given the  
319 frequency that ID and ASD co-occur, 14 proteins were identified in both datasets, including  
320 KDM5B, KDM5C and BRD4. In addition, 9 ID-associated proteins were identified, including  
321 MED17, the NURD chromatin remodeling complex component GATAD2A and the C-terminal  
322 binding protein (CtBP) transcriptional repressor. Combined, these analyses expand our  
323 understanding of the potential network of proteins that function with KDM5 and provide new  
324 avenues for investigating the links between KDM5 family proteins and the etiology of  
325 neurodevelopmental disorders. A summary of our KDM5 interaction data highlighting proteins  
326 with known roles in transcriptional regulation is shown in Figure 5D.

327

328 **Discussion**

329           Here we describe the interactome of *Drosophila* KDM5 in the adult head using TurboID-  
330 mediated proximity labeling. To identify the broadest selection of potential interactors, we N- and  
331 C-terminally TurboID-tagged KDM5 as some interactors were expected to be in proximity to both  
332 termini while others might be terminus specific. Importantly, TurboID-KDM5 chimeric proteins  
333 were functional, as they were able to rescue the lethality caused by a *kdm5*<sup>140</sup> null allele. Using  
334 NT-KDM5 and CT-KDM5, we performed two experiments to optimize the experimental controls,  
335 as none are established for this relatively new technique. Our study revealed that expression of  
336 TurboID alone led to high background levels of biotinylation, particularly of chromatin-related  
337 proteins. In contrast, using control (endogenous biotinylation and bead background) or  
338 dCas9:TurboID provided similar and more reasonable background to identify proteins enriched  
339 by expression of TurboID-KDM5. Because we carried out two separate MS experiments, we were  
340 able to stringently filter our data to retain only those proteins that were nuclear localized and  
341 showed high reproducibility and rigor. This led to the identification of 87 high confidence KDM5  
342 interactors, 12 of which were previously described in either *Drosophila* or mammals. Notably,  
343 while we refer to proteins identified in our TurboID analyses as interactors, we acknowledge that  
344 proximity labeling does not necessarily detect direct interactions. However, TurboID biotinylates  
345 lysine residues within 10 nm of its active site(54), which is equivalent to about 27 bp of B-DNA (8  
346 bp per 3.4 nm). However unlikely, this short biotinylation radius can result in the identification of  
347 proteins that are nearby but in a distinct complex that do not physically touch KDM5. While these  
348 proteins are not in the same complex(es) as KDM5, they could still function with KDM5 to regulate  
349 gene expression by acting in concert with, or independently of, its histone demethylase activity.  
350 For simplicity, we will refer TurboID-enriched proteins as interactors.

351  
352           Several lines of evidence allow us to have confidence in our described KDM5 interactome.  
353 The first is that we identified 88% of proteins previously described as KDM5 interacting proteins  
354 in flies and mammalian cells. We did not, however, detect all previously known KDM5 interactors

355 in our proximity-labeling studies. For example, our prior studies have shown interactions between  
356 KDM5 and the transcription factors Myc and Foxo, and one of the best-established interactions  
357 of mammalian KDM5 proteins is with the Retinoblastoma protein (RBF in *Drosophila*).<sup>(5,72,85)</sup>  
358 None of these proteins were significantly enriched in our current study. Because these  
359 interactions have not been examined in neuronal cells, this may simply reflect differences in  
360 KDM5 complex composition across cell types. Alternatively, these complexes may be low  
361 abundance and therefore more difficult to detect by proteomic approaches. While we undoubtedly  
362 missed some KDM5 interactors, we were able to reproducibly enrich a number of proteins using  
363 both NT- and CT-KDM5 across two independent experiments. In addition, many of the proteins  
364 identified have known physical connectivity with each other. Thus, rather than identifying  
365 individual components of complexes, we identified proteins well known to complex with each  
366 other, such as the SWI/SNF and NURF chromatin remodeling complexes. Interestingly, a  
367 functional link between KDM5 and these complexes is supported by studies in mouse embryonic  
368 stem cells which showed that a loss of KDM5B altered nucleosome position surrounding the TSS,  
369 although the mechanism was not revealed.<sup>(86)</sup> We also identified the insulator proteins BEAF-  
370 32, Chromator, Putzig, and Cp190 which complex together.<sup>(66,67)</sup> Our previous investigation in  
371 a fly strain harboring an allele associated with human intellectual disability identified enrichment  
372 of BEAF-32 binding sites at dysregulated genes.<sup>(26)</sup> Functionally, it is also notable that mutations  
373 in *kdm5*, *BEAF-32*, and *putzig* all modify position effect variegation (PEV) suggesting the  
374 possibility that these proteins function together to regulate chromatin compaction and/or  
375 organization.<sup>(87–89)</sup> For some TurboID-identified proteins such as the Mediator complex  
376 components (MED1, MED14, and MED17), as well as the TFIID proteins (Taf4, Taf6, and Taf9),  
377 published structural data are consistent with their link to KDM5.<sup>(73,90)</sup> The Mediator and Taf  
378 proteins identified neighbor each other, respectively, in the hTPIC cryo-electron microscopy  
379 structure. Moreover, we found that KDM5 interactions could be mapped to distinct surfaces at the  
380 hTPIC, suggesting one way that KDM5 could localize with respect to key transcriptional initiation

381 machinery. Our enrichment of a subset of transcriptional preinitiation proteins implies that this is  
382 not simply due to KDM5 proteins binding near the promoter region of its target genes. If that were  
383 the case, then the entire preinitiation complex would have been identified in our datasets,  
384 including TBP and RNA Pol II. We additionally observed enrichment for proteins implicated in  
385 enhancer function, such as Zmynd8 that has previously been shown to interact with KDM5A and  
386 KDM5D and binds to monomethylated histone H3 lysine 4 (H3K4me1), a chromatin mark that is  
387 found at enhancers.(42,44) Consistent with the possibility that KDM5 may impact the chromatin  
388 status and activity of enhancers, our studies additionally revealed enrichment for the  
389 methyltransferase responsible for depositing H3K4me1, Trr/KMT2C.(91) Further studies are now  
390 required to define precisely which proteins directly interact with KDM5 to provide insight into how  
391 KDM5 carries out its functions to influence gene expression. Importantly, given the range of  
392 proteins found in our study, KDM5 may use distinct mechanisms to modulate gene expression  
393 levels in different genomic contexts and in cell distinct types. Although limited by the number of  
394 available ChIP-seq datasets available, corroborating evidence for our interactors also comes from  
395 the extensive overlap in genomic binding observed in *Drosophila* and/or mammalian cells.

396

397 The relationships between KDM5 and other gene regulatory complexes provide insight  
398 into how its dysregulation could contribute to human disorders. Many of the interacting complexes  
399 identified in our study have been implicated in tumorigenesis, including NSL and SWI/SNF.(92–  
400 95) Furthermore, like KDM5, MED1 has been implicated as a transcriptional coactivator that  
401 mediates breast cancer metastasis and treatment resistance.(96,97) Identification of KDM5  
402 interactors may provide insight to mechanisms of KDM5-mediated transcriptional regulation which  
403 underlie tumor development and progression. Changes to protein interactions could also  
404 contribute to the intellectual disability seen in individuals with genetic variants in KDM5A, KDM5B,  
405 or KDM5C. Indeed, for variants that do not alter histone demethylase activity, this may be a  
406 contributor to cognitive dysfunction. Our analyses of KDM5 interactors revealed an enrichment in



407 proteins found to be altered in neurodevelopmental disorders whose clinical presentations overlap  
408 with those seen for KDM5 genes. KDM5 and interacting proteins could therefore influence  
409 neurodevelopment through common pathways. Altogether, our study suggests that KDM5 likely  
410 functions through numerous transient interactions with interconnected complexes to regulate  
411 gene expression in a context-dependent manner.

412

### 413 **AUTHOR CONTRIBUTIONS**

414 Conceptualization, M.Y., J.S.; Methodology, M.Y., S.S.; Investigation, M.Y. and J.S.; Writing –  
415 original draft, J.S. and M.Y., Writing – Reviewing and Editing, J.S., M.Y., and S.S.; Funding  
416 acquisition, J.S., M.Y and S.S., Supervision, J.S. and S.S.

417

### 418 **DECLARATIONS**

#### 419 **Ethics approval and consent to participate**

420 N/A

421

#### 422 **Competing interests**

423 The authors declare no competing interests.

424

#### 425 **Funding**

426 This research was supported by the NIH F31GM146347 and T32GM007288 to M.Y., NIH  
427 R01GM112783 and the Irma T. Hirschl Trust to J.S., and AFAR, Deerfield, Relay Therapeutics,  
428 Merck, NIH 1-S10-OD030286-01 to S.S.

429

#### 430 **Availability of data and materials**

431 Transgenic fly strains described here are available upon request to Julie Secombe  
432 (Julie.secombe@einsteinmed.edu).

433

434 **ACKNOWLEDGMENTS**

435 We thank members of the Secombe Lab, Melissa Castiglione, Blair Schneider, Michael Rogers,  
436 and Bethany Terry, as well as Michelle Schumacher for their feedback throughout this project and  
437 edits on the manuscript. We also appreciate the availability of stocks from the Bloomington  
438 *Drosophila* Stock Center (NIH P40OD018537) and are grateful to the Cancer Center Support  
439 Grant P30CA013330. This research was supported by the NIH Ruth L. Kirschstein National  
440 Research Service Award F31GM146347 and the Einstein MSTP Training Grant T32GM007288  
441 to M.Y., NIH R01GM112783 and support from the Irma T. Hirschl Trust to J.S. The Sidoli lab  
442 gratefully acknowledges for financial support AFAR (Sagol Network GerOmics award), Deerfield  
443 (Xseed award), Relay Therapeutics, Merck, the NIH Office of the Director (1-S10-OD030286-01),  
444 the Einstein-Mount Sinai Diabetes Research Center, and the Einstein Cancer Center (P30-  
445 CA013330-47).

446

447

448 **FIGURE LEGENDS**

449 **Figure 1: TurboID-tagged KDM5 proteins are functional and biotinylate endogenous**  
450 **proteins**

451 (A) Schematic of the workflow used for purifying and fingerprinting biotinylated proteins from  
452 adult heads using LC-MS/MS mass spectrometry.

453 (B) Schematic of the four UASp constructs generated able to express HA-tagged TurboID  
454 alone, dCas9:TurboID, NT-KDM5 and CT-KDM5.

455 (C) Western blot using adult heads showing levels of expression of KDM5 using anti-HA,  
456 biotinylation using a streptavidin-680 conjugate and the loading control alpha-tubulin.  
457 Genotypes: *kdm5<sup>140</sup>* ; *gkdm5:HA* (a wild-type strain; Control), Ubi-Gal4/+ ; UASp-  
458 *TurboID*/+ (TurboID), Ubi-Gal4/+ ; UASp-*dCas9:TurboID* (dCas9:TurboID), *kdm5<sup>140</sup>*, Ubi-  
459 Gal4/*kdm5<sup>140</sup>* ; UASp-NT- *kdm5*/+ (NT-KDM5) and *kdm5<sup>140</sup>*, Ubi-Gal4/*kdm5<sup>140</sup>* ; UASp-CT-  
460 *kdm5* /+ (CT-KDM5).

461 (D) Rescue of *kdm5<sup>140</sup>*-induced lethality by ubiquitous expression of UAS-NT-*KDM5* or UAS-  
462 CT-*KDM5* using Ubi-Gal4. Genotype of male and female adult flies shown is *kdm5<sup>140</sup>*, Ubi-  
463 Gal4/*kdm5<sup>140</sup>* ; UASp-NT- *kdm5* /+ (NT-KDM5) and *kdm5<sup>140</sup>*, Ubi-Gal4/*kdm5<sup>140</sup>* ; UASp-  
464 CT- *kdm5* /+ (CT-KDM5).

465

466 **Figure 2: Identification of high confidence KDM5 interactors through TurboID**

467 (A) Volcano plot showing data comparing biotinylated proteins enriched by NT-KDM5 to  
468 control.

469 (B) Volcano plot showing data comparing CT-KDM5 to control.

470 (C) Volcano plot showing data comparing NT-KDM5 to TurboID.

471 (D) Volcano plot showing data comparing CT-KDM5 to TurboID.

472 (E) Volcano plot showing data comparing NT-KDM5 to dCas9:TurboID.

473 (F) Volcano plot showing data comparing CT-KDM5 to dCas9:TurboID.

474 (G) Filtering workflow for identification of high confidence KDM5 interactors by combining data  
475 from experiments 1 and 2.

476 (H) Summary of known *Drosophila* KDM5 interactors, whether the interaction is conserved in  
477 mammals (mouse or human) and the identification of these proteins in experiment 1 and  
478 experiment 2 compared to control and dCas9:TurboID. Three interactors identified in  
479 mammalian cells but not previously in *Drosophila* are also included (Caf1-55, Mi-2 and  
480 Zmynd8).

481 (I) High confidence interactors (HCI) based on their identification in experiment 1 (compared  
482 to control) and experiment 2 (compared to control and dCas9:TurboID). Dark red box  
483 indicates enrichment of  $p < 0.05$ , pink indicates  $p < 0.1$ .

484 For all volcano plots shown, known interactors are indicated with text. Red dots indicate  
485 significantly enriched proteins ( $p < 0.05$ ) and the dotted line on Y-axis indicates  $p = 0.05$ .

486

487 **Figure 3: TurboID-tagged KDM5 biotinylates proteins involved in several aspects of gene**  
488 **expression regulation.**

489 (A) STRING analyses of nuclear proteins that were significantly biotinylated by NT-KDM5 and  
490 CT-KDM5. Grey lines indicate known physical interactions between proteins. Darker lines  
491 indicate a higher confidence of interaction. Cytoscape was used to manually cluster  
492 annotated proteins based on their STRING Cluster Enrichment and known functions  
493 based on published literature. Unconnected nodes and proteins with unclear links to  
494 known complexes are not shown.

495 (B) Gene Ontology Biological Process (GO-BP) analyses of the 87 high confidence KDM5  
496 interacting proteins.

497 (C) Structure of the human pre-initiation complex (PDB accession: 7ENA) showing proteins  
498 identified as high confidence interactors in our TurboID data in red bubbles. DNA (yellow),  
499 TBP (pink bubbles) and RNA polymerase II (cyan bubbles) are also shown.

500

501 **Figure 4: Proteins enriched in KDM5 TurboID experiments show overlapping genomic**  
502 **binding profiles in *Drosophila* and human cells.**

503 (A) Venn diagram showing overlap between high confidence biotinylated proteins (red) and  
504 datasets enriched when comparing published KDM5 ChIP-seq data from whole adult flies  
505 to other *Drosophila* ChIP datasets (blue). A total of 27 datasets showed significant overlap  
506 using ChIP-atlas. 30 interactors had ChIP-seq datasets in the ChIP Atlas database  
507 (green).

508 (B) Volcano plot showing fold enrichment and p-values of the permutation analyses between  
509 KDM5 and 27 ChIP-seq datasets of high confidence interactors.

510 (C) Heat maps showing ChIP-seq genomic binding profiles of Sin3A from S2 cells and KDM5  
511 from whole adult flies.

512 (D) Genomic binding profiles of BEAF-32 ChIP-seq from S2 cells and KDM5.

513 (E) Genomic binding profiles of Dref ChIP-seq from Kc167 cells and KDM5.

514 (F) Genomic binding profiles of Iswi ChIP-seq from Kc167 cells and KDM5.

515 (G) Genomic binding profiles of fs(1)h ChIP-seq from Kc167 cells and KDM5.

516 (H) Representative genome browser image showing binding of KDM5, Sin3A, BEAF-32, Dref,  
517 fs(1)h, and Iswi .

518 (I) Venn diagram showing overlap between human orthologs of *Drosophila* KDM5 high  
519 confidence interactors (HCI) and their enrichment when comparing published KDM5B  
520 ChIP-seq data to breast cancer ChIP-seq datasets using ChIP-Atlas. 26 datasets  
521 significantly overlapped.

522 (J) Volcano plot showing fold enrichment and p-values of the permutation analyses between  
523 KDM5B and 26 ChIP-seq datasets of human-ortholog converted high confidence  
524 interactors.

525 (K) Genomic binding profiles of KDM5B, SIN3A and BRD4 showing similar genome-wide  
526 binding. Binding is shown relative to KDM5B due to the much larger number of SIN3A and  
527 BRD4 binding sites in the genome compared to KDM5B.

528 (L) Genomic binding profiles of MED1 ChIP from MCF-7 cells and KDM5B showing similar  
529 localization.

530 (M) Genomic binding profiles of SUMO2 (ortholog of *Drosophila* Sumo) ChIP from MCF-7 cells  
531 and KDM5B showing similar localization.

532 (N) Representative genome browser image showing binding of KDM5B, SIN3A, MED1, BRD4  
533 and SUMO2.

534

535 **Figure 5: A subset of KDM5 interactors are implicated in neurodevelopmental disorders**

536 (A) Overlap between human orthologs of *Drosophila* KDM5 interactors and genes associated  
537 with ASD using the SFARI database. S indicates syndromic ASD. Scores indicate  
538 confidence of causal association, with 1 indicating strongest link.

539 (B) 26 candidate interacting proteins identified and their SFARI score.

540 (C) 24 candidate interacting proteins were identified as being implicated in ID, ASD and/or  
541 schizophrenia using DBD.

542 (D) Model for KDM5 interactions with key transcriptional proteins that are likely to impact the  
543 expression of downstream target genes.

544

545 **Figure S1: KDM5-TurboID studies using control and TurboID alone**

546 (A) Principal component analysis of normalized nuclear protein abundances from control (Ctl),  
547 TurboID, NT-KDM5 and CT-KDM5 (experiment 1 data).

548 (B) Volcano plot showing data comparing NT-KDM5 to control.

549 (C) Volcano plot showing data comparing CT-KDM5 to control.

- 550 (D) Venn diagram showing overlap of the proteins identified using NT-KDM5 and CT-KDM5  
551 compared to control (Ctl).
- 552 (E) Volcano plot showing data comparing NT-KDM5 to TurboID.
- 553 (F) Volcano plot showing data comparing CT-KDM5 to TurboID.
- 554 (G) Venn diagram showing overlap of the proteins identified using NT-KDM5 and CT-KDM5  
555 compared to TurboID.
- 556 (H) Summary of known *Drosophila* KDM5 interactors, whether the interaction is conserved in  
557 mammals (mouse and/or human) and the identification of these proteins in experiment 1  
558 with all comparisons. Three interactors identified in mammalian cells but not previously in  
559 *Drosophila* are also included (Caf1-55, Mi-2 and Zmynd8).
- 560 (I) Volcano plot showing data comparing TurboID to control.

561 For all volcano plots shown, known interactors are indicated with text. Red dots indicate  
562 significantly enriched proteins ( $p < 0.05$ ) and the dotted line on Y-axis indicates  $p = 0.05$ .

563

#### 564 **Figure S2: Comparing TurboID alone to dCas9:TurboID**

- 565 (A) Principal component analysis of normalized nuclear protein abundances from control (Ctl;  
566 grey), dCas9:TurboID (T-dCas9; green), TurboID (black), NT-KDM5 (red) and CT-KDM5  
567 (blue).
- 568 (B) Volcano plot showing data comparing dCas9:TurboID to TurboID alone. Red dots indicate  
569 significantly enriched proteins ( $p < 0.05$ ) and the dotted line on Y-axis indicates  $p = 0.05$ .
- 570 (C) Volcano plot showing data comparing dCas9:TurboID to control. Red dots indicate  
571 significantly enriched proteins ( $p < 0.05$ ) and the dotted line on Y-axis indicates  $p = 0.05$ .
- 572 (D) GO analyses of proteins enriched comparing TurboID to control (Ctl), TurboID to  
573 dCas9:TurboID, dCas9:TurboID to TurboID and dCas9:TurboID to control.
- 574 (E) UpSet plot showing the number of common interactors identified in experiments in which  
575 TurboID was used to compare datasets using  $p < 0.05$ .

576 (F) UpSet plot showing the number of common interactors identified in experiments in which  
577 TurboID was used to compare datasets using  $p < 0.1$ .

578 (G) Summary of all known interactors identified in all experimental comparisons from  
579 experiment 1 and experiment 2.

580

581 **Figure S3: Binding of KDM5 proteins and identified interactors relative to the**  
582 **transcriptional start site**

583 (A) Genomic binding profiles of *Drosophila* KDM5, Sin3A, fs(1)h, BEAF-32, Dref and Iswi  
584 relative to the TSS.

585 (B) Genomic binding profiles of human KDM5B, SIN3A, BRD4 (fs(1)h ortholog), MED1 and  
586 SUMO2 relative to the TSS.

587

588

## 589 **MATERIALS AND METHODS**

### 590 **Fly strains and care**

591 Fly crosses were maintained at 25°C with 50% humidity and a 12-hour light/dark cycle. Food (per  
592 liter) contained 18g yeast, 22g molasses, 80g malt extract, 9g agar, 65 cornmeal, 2.3g methyl  
593 para-benzoic acid, 6.35ml propionic acid. The number of male and female animals were equal  
594 across all genotypes examined. The *kdm5*<sup>140</sup> null allele has been previously described. (33)

595

### 596 **Cloning and Transgenesis**

597 The N- and C-terminally TurboID-tagged constructs were generated by cloning the coding region  
598 of *kdm5* upstream or downstream of HA:TurboID from pCDNA3-TurboID  
599 (RRID:Addgene\_107171)(46) in the pUASpattB vector (RRID:DGRC\_1358). UASp-HA:TurboID  
600 with a NLS was generated by cloning HA:TurboID into the same UASpattB vector. UASp-  
601 dCas:HA:Turbo:NLS was made by combining the dCas9 open reading frame from SID3s-dCas9-



602 KRAB (RRID:Addgene\_106399) with HA:TurbolID:NLS in the pUASpattB vector  
603 (RRID:DGRC\_1358). All transgenes were generated by injection into  $y^1$  M{RFP[3xP3.PB]  
604 GFP[E.3xP3]=vas-int.Dm}ZH-2A w<sup>\*</sup>; M{3xP3-RFP.attP}ZH-86Fb at BestGene Inc.

605

## 606 **Western Blotting**

607 Western analyses were carried out as previously described. (33) Briefly, five 2- to 5-day old adult  
608 fly heads were homogenized in 2x NuPAGE LDS sample buffer, sonicated for 10 mins, treated  
609 with DTT, run on a 4-12% Bis-Tris 1 mm gel and transferred to a PVDF membrane. The following  
610 primary antibodies were used: mouse anti-HA (1:1000, Cell Signaling Technology Cat# 2367,  
611 RRID: AB\_10691311), Streptavidin 680 (1:10,000, ThermoFisher, Streptavidin Alexa Fluor 680  
612 conjugate), rabbit anti-alpha-Tubulin (1:5000, Cell Signaling Technology Cat# 2144,  
613 RRID:AB\_2210548). Secondary antibodies used were IRDye<sup>®</sup> 680RD Donkey anti-Mouse  
614 IgG (1:5000; LI-COR Biosciences Cat# 925-68072, RRID: AB\_2814912) and IRDye<sup>®</sup> 800CW  
615 Donkey anti-Rabbit IgG (1:5000; LI-COR Biosciences Cat# 926-32213, RRID: AB\_621848). Blots  
616 were scanned and processed using a LI-COR Odyssey Infrared scanner.

617

## 618 **Purifying and identifying proteins using TurbolID**

### 619 **Biotinylated Protein Enrichment**

620 2-5 day-old flies were flash frozen in liquid nitrogen and decapitated and a total of ten heads were  
621 used per sample. Heads were homogenized in 250  $\mu$ L RIPA Buffer (Thermofisher 89901)  
622 supplemented with Halt<sup>™</sup> Protease Inhibitor Cocktail (Thermofisher, 78430) and centrifuged at 4  
623  $^{\circ}$ C for 10 minutes at 15,000XG to remove debris. 100  $\mu$ L of Pierce<sup>™</sup> Streptavidin Magnetic Beads  
624 (Thermofisher, 88817) were washed twice with RIPA and the cleared lysate was added. The  
625 lysate-bead mixture was incubated with rotation at 4  $^{\circ}$ C overnight. The next day the lysate was  
626 discarded, and beads were washed twice with RIPA, once with 1M KCl, once with 0.1 M Na<sub>2</sub>HCO<sub>3</sub>,

627 once with 1 M Urea in 10 mM Tris pH 8.0, and twice again with RIPA. For Western Blot analyses  
628 all RIPA was removed and biotinylated proteins were eluted with 4X NuPAGE™ LDS Sample  
629 Buffer (Invitrogen, NP0007) supplemented with 2 mM biotin and 20 mM DTT.

### 630 **On-bead protein digestion**

631 Proteins were digested directly on streptavidin beads. 5 mM DTT and 50 mM ammonium  
632 bicarbonate (pH = 8) were added to the solution and left on the bench for about 1 hour for disulfide  
633 bond reduction. Samples were then alkylated with 20 mM iodoacetamide in the dark for 30  
634 minutes. Afterward, 500 ng of trypsin was added to the samples, which were digested at 37 °C  
635 for 18 h. The peptide solution was dried in a vacuum centrifuge.

### 636 **Sample desalting**

637 Prior to mass spectrometry analysis, samples were desalted using a 96-well plate filter (Orochem)  
638 packed with 1 mg of Oasis HLB C-18 resin (Waters). Briefly, the samples were resuspended in  
639 100 µl of 0.1% TFA and loaded onto the HLB resin, which was previously equilibrated using 100  
640 µl of the same buffer. After washing with 100 µl of 0.1% TFA, the samples were eluted with a  
641 buffer containing 70 µl of 60% acetonitrile and 0.1% TFA and then dried in a vacuum centrifuge.

### 642 **LC-MS/MS Acquisition and Analysis**

643 Samples were resuspended in 10 µl of 0.1% TFA and loaded onto a Dionex RSLC Ultimate 300  
644 (Thermo Scientific), coupled online with an Orbitrap Fusion Lumos (Thermo Scientific).  
645 Chromatographic separation was performed with a two-column system, consisting of a C-18 trap  
646 cartridge (300 µm ID, 5 mm length) and a picofrit analytical column (75 µm ID, 25 cm length)  
647 packed in-house with reversed-phase Repro-Sil Pur C18-AQ 3 µm resin. Peptides were separated  
648 using a 90 min gradient from 4-30% buffer B (buffer A: 0.1% formic acid, buffer B: 80% acetonitrile  
649 + 0.1% formic acid) at a flow rate of 300 nL/min. The mass spectrometer was set to acquire  
650 spectra in a data-dependent acquisition (DDA) mode. Briefly, the full MS scan was set to 300-  
651 1200 m/z in the orbitrap with a resolution of 120,000 (at 200 m/z) and an AGC target of 5x10e5.  
652 MS/MS was performed in the ion trap using the top speed mode (2 secs), an AGC target of 1x10e4

653 and an HCD collision energy of 35. Raw files were searched using Proteome Discoverer software  
654 (v2.4, Thermo Scientific) using SEQUEST search engine and the UniProt database of *Drosophila*  
655 *melanogaster*. The search for total proteome included variable modification of N-terminal  
656 acetylation, and fixed modification of carbamidomethyl cysteine. Trypsin was specified as the  
657 digestive enzyme with up to 2 missed cleavages allowed. Mass tolerance was set to 10 pm for  
658 precursor ions and 0.2 Da for product ions. Peptide and protein false discovery rate was set to  
659 1%. Following the search, data was processed as described by Aguilan et al.(98). Briefly, proteins  
660 were log<sub>2</sub> transformed, normalized by the average value of each sample and missing values were  
661 imputed using a normal distribution 2 standard deviations lower than the mean. Statistical  
662 regulation was assessed using heteroscedastic T-test (if *p*-value < 0.05). Data were assumed to  
663 be Gaussian distributed but this was not formally tested.

664

### 665 **Interaction Map Generation**

666 STRINGDB(62) and Cytoscape(63) were used for physical interaction mapping. Lines between  
667 proteins represent physical interaction and the darkness of the lines represent the confidence of  
668 physical interaction. A confidence score of greater than 0.4/1 was used as a cutoff. Nodes were  
669 manually positioned and annotated using STRING GO Clusters and published literature as an  
670 organizational guide.

671

### 672 **Bioinformatic Analyses**

673 Gene Ontology analysis utilized R packages clusterProfiler (v4.4.4)(99) and ReactomePA  
674 (v1.40.0)(100). Volcano plots were generated using EnhancedVolcano (v1.14.0).(101) The  
675 Enrichment Analysis function on ChIP Atlas(74) was used to perform permutation tests, which  
676 compares the overlap of datasets using genomic ranges of called peaks (BED files). For our  
677 studies, the query datasets were *Drosophila* KDM5 (SRX1084165) and Human KDM5B  
678 (SRX3285561), which were compared using the following specific parameters: “TFs and others”,

679 cell type class was set to 'All types' and 'Breast' for *Drosophila* and Human respectively. A 100X  
680 random permutation of each was used as the control. For these analyses, a single base pair  
681 overlap is considered as an overlap. For *Drosophila*, selected profiles were generated using  
682 bigWig files from: KDM5 (SRX1084165), Sin3A (SRX1158165), BEAF-32 (SRX386677), Dref  
683 (SRX749042), Iswi (SRX5346167), and fs(1)h (SRX203000). For Human, selected profiles  
684 generated using: KDM5B (SRX3285561), SIN3A (SRX190318), MED1 (SRX673749), BRD4  
685 (SRX5089551), and SUMO2 (SRX3541112). Deeptools(3.5.1)(102) computeMatrix and  
686 plotHeatmap functions were used to make profiles and heatmaps. For these, the corresponding  
687 BED files from each interactor's SRX accession was used as the --region option. The bigWigs for  
688 the interactor and KDM5 were used in the --score option, bin size was set to 5 bp. Due to large  
689 differences in peak number, for Figure 4K, KDM5B's BED file was used as the region file.  
690 Pygenometracks(3.7)(103) was used to visualize ChIP-seq tracks.

691

692

693 **References**

- 694 1. Pavlenko E, Ruengeler T, Engel P, Poepsel S. Functions and interactions of mammalian  
695 KDM5 demethylases. *Frontiers in genetics*. 2022 Jul 11;13:906662.
- 696 2. Holowatyj A, Yang ZQ, Pile LA. Histone lysine demethylases in *Drosophila melanogaster*.  
697 *Fly (Austin)*. 2015;9(1):36–44.
- 698 3. Lee N, Zhang J, Klose RJ, Erdjument-Bromage H, Tempst P, Jones RS, et al. The trithorax-  
699 group protein Lid is a histone H3 trimethyl-Lys4 demethylase. *Nature Structural &*  
700 *Molecular Biology*. 2007 Apr;14(4):341–3.
- 701 4. Secombe J, Li L, Carlos L, Eisenman RN. The Trithorax group protein Lid is a trimethyl  
702 histone H3K4 demethylase required for dMyc-induced cell growth. *Genes & Development*.  
703 2007 Mar 1;21(5):537–51.
- 704 5. Klose RJ, Yan Q, Tothova Z, Yamane K, Erdjument-Bromage H, Tempst P, et al. The  
705 retinoblastoma binding protein RBP2 is an H3K4 demethylase. *Cell*. 2007 Mar  
706 9;128(5):889–900.
- 707 6. Klein BJ, Piao L, Xi Y, Rincon-Arano H, Rothbart SB, Peng D, et al. The histone-H3K4-  
708 specific demethylase KDM5B binds to its substrate and product through distinct PHD  
709 fingers. *Cell reports*. 2014 Jan 30;6(2):325–35.
- 710 7. Yang GJ, Zhu MH, Lu XJ, Liu YJ, Lu JF, Leung CH, et al. The emerging role of KDM5A in  
711 human cancer. *J Hematol Oncol*. 2021 Feb 17;14(1):30.
- 712 8. Blair LP, Cao J, Zou MR, Sayegh J, Yan Q. Epigenetic regulation by lysine demethylase 5  
713 (KDM5) enzymes in cancer. *Cancers*. 2011 Mar 1;3(1):1383–404.
- 714 9. Hatch HAM, Secombe J. Molecular and cellular events linking variants in the histone  
715 demethylase KDM5C to the intellectual disability disorder Claes-Jensen syndrome. *FEBS J*.  
716 2021 Sep 18;
- 717 10. Yamamoto S, Wu Z, Russnes HG, Takagi S, Peluffo G, Vaske C, et al. JARID1B is a  
718 luminal lineage-driving oncogene in breast cancer. *Cancer Cell*. 2014 Jun 16;25(6):762–77.
- 719 11. Hinohara K, Wu HJ, Vigneau S, McDonald TO, Igarashi KJ, Yamamoto KN, et al. KDM5  
720 histone demethylase activity links cellular transcriptomic heterogeneity to therapeutic  
721 resistance. *Cancer Cell*. 2018 Dec 10;34(6):939-953.e9.
- 722 12. Horton JR, Engstrom A, Zoeller EL, Liu X, Shanks JR, Zhang X, et al. Characterization of  
723 a linked jumonji domain of the KDM5/JARID1 family of histone H3 lysine 4 demethylases.  
724 *The Journal of Biological Chemistry*. 2016 Feb 5;291(6):2631–46.

- 725 13. Arifuzzaman S, Khatun MR, Khatun R. Emerging of lysine demethylases (KDMs): From  
726 pathophysiological insights to novel therapeutic opportunities. *Biomedicine &*  
727 *Pharmacotherapy (Biomedecine & Pharmacotherapie)*. 2020 Sep;129:110392.
- 728 14. He R, Xhabija B, Gopi LK, Kurup JT, Xu Z, Liu Z, et al. H3K4 demethylase KDM5B  
729 regulates cancer cell identity and epigenetic plasticity. *Oncogene*. 2022 May;41(21):2958–  
730 72.
- 731 15. Xhabija B, Kidder BL. KDM5B is a master regulator of the H3K4-methylome in stem cells,  
732 development and cancer. *Semin Cancer Biol*. 2019 Aug;57:79–85.
- 733 16. Roesch A, Vultur A, Bogeski I, Wang H, Zimmermann KM, Speicher D, et al. Overcoming  
734 intrinsic multidrug resistance in melanoma by blocking the mitochondrial respiratory chain  
735 of slow-cycling JARID1B(high) cells. *Cancer Cell*. 2013 Jun 10;23(6):811–25.
- 736 17. Iwase S, Lan F, Bayliss P, de la Torre-Ubieta L, Huarte M, Qi HH, et al. The X-linked  
737 mental retardation gene SMCX/JARID1C defines a family of histone H3 lysine 4  
738 demethylases. *Cell*. 2007 Mar 23;128(6):1077–88.
- 739 18. Abidi FE, Holloway L, Moore CA, Weaver DD, Simensen RJ, Stevenson RE, et al.  
740 Mutations in JARID1C are associated with X-linked mental retardation, short stature and  
741 hyperreflexia. *Journal of Medical Genetics*. 2008 Dec;45(12):787–93.
- 742 19. Tzschach A, Lenzner S, Moser B, Reinhardt R, Chelly J, Fryns JP, et al. Novel  
743 JARID1C/SMCX mutations in patients with X-linked mental retardation. *Human Mutation*.  
744 2006 Apr;27(4):389.
- 745 20. El Hayek L, Tuncay IO, Nijem N, Russell J, Ludwig S, Kaur K, et al. KDM5A mutations  
746 identified in autism spectrum disorder using forward genetics. *Elife*. 2020 Dec 22;9:e56883.
- 747 21. Harrington J, Wheway G, Willaime-Morawek S, Gibson J, Walters ZS. Pathogenic  
748 KDM5B variants in the context of developmental disorders. *Biochim Biophys Acta Gene*  
749 *Regul Mech*. 2022 Jul;1865(5):194848.
- 750 22. Iwase S, Brookes E, Agarwal S, Badeaux AI, Ito H, Vallianatos CN, et al. A Mouse Model  
751 of X-linked Intellectual Disability Associated with Impaired Removal of Histone  
752 Methylation. *Cell reports*. 2016 Feb 9;14(5):1000–9.
- 753 23. Scandaglia M, Lopez-Atalaya JP, Medrano-Fernandez A, Lopez-Cascales MT, Del Blanco  
754 B, Lipinski M, et al. Loss of Kdm5c Causes Spurious Transcription and Prevents the Fine-  
755 Tuning of Activity-Regulated Enhancers in Neurons. *Cell reports*. 2017 Oct 3;21(1):47–59.
- 756 24. Belalcazar HM, Hendricks EL, Zamurrad S, Liebl FLW, Secombe J. The histone  
757 demethylase KDM5 is required for synaptic structure and function at the *Drosophila*  
758 neuromuscular junction. *Cell reports*. 2021 Feb 16;34(7):108753.
- 759 25. Hatch HA, Belalcazar HM, Marshall OJ, Secombe J. A KDM5-Prospero transcriptional  
760 axis functions during early neurodevelopment to regulate mushroom body formation. *eLife*

- 761 [Internet]. 2021 Mar 17 [cited 2021 Apr 22];10. Available from:  
762 <http://dx.doi.org/10.7554/eLife.63886>
- 763 26. Zamurrad S, Hatch HAM, Drelon C, Belalcazar HM, Secombe J. A drosophila model of  
764 intellectual disability caused by mutations in the histone demethylase KDM5. *Cell reports*.  
765 2018 Feb 27;22(9):2359–69.
- 766 27. Yao W, Peng Y, Lin D. The flexible loop L1 of the H3K4 demethylase JARID1B ARID  
767 domain has a crucial role in DNA-binding activity. *Biochem Biophys Res Commun*. 2010  
768 May 28;396(2):323–8.
- 769 28. Tu S, Teng YC, Yuan C, Wu YT, Chan MY, Cheng AN, et al. The ARID domain of the  
770 H3K4 demethylase RBP2 binds to a DNA CCGCCC motif. *Nat Struct Mol Biol*. 2008  
771 Apr;15(4):419–21.
- 772 29. Scibetta AG, Santangelo S, Coleman J, Hall D, Chaplin T, Copier J, et al. Functional  
773 analysis of the transcription repressor PLU-1/JARID1B. *Mol Cell Biol*. 2007  
774 Oct;27(20):7220–35.
- 775 30. Villaseñor R, Pfaendler R, Ambrosi C, Butz S, Giuliani S, Bryan E, et al. ChromID  
776 identifies the protein interactome at chromatin marks. *Nat Biotechnol*. 2020 Jun;38(6):728–  
777 36.
- 778 31. Li L, Greer C, Eisenman RN, Secombe J. Essential functions of the histone demethylase lid.  
779 *PLoS Genetics*. 2010 Nov 24;6(11):e1001221.
- 780 32. Wang GG, Song J, Wang Z, Dormann HL, Casadio F, Li H, et al. Haematopoietic  
781 malignancies caused by dysregulation of a chromatin-binding PHD finger. *Nature*. 2009  
782 Jun 11;459(7248):847–51.
- 783 33. Drelon C, Belalcazar HM, Secombe J. The histone demethylase KDM5 is essential for  
784 larval growth in drosophila. *Genetics*. 2018 May 15;209(3):773–87.
- 785 34. Brookes E, Laurent B, Öunap K, Carroll R, Moeschler JB, Field M, et al. Mutations in the  
786 intellectual disability gene KDM5C reduce protein stability and demethylase activity. *Hum*  
787 *Mol Genet*. 2015 May 15;24(10):2861–72.
- 788 36. Vallianatos CN, Farrehi C, Friez MJ, Burmeister M, Keegan CE, Iwase S. Altered Gene-  
789 Regulatory Function of KDM5C by a Novel Mutation Associated With Autism and  
790 Intellectual Disability. *Front Mol Neurosci*. 2018;11:104.
- 791 37. Tahiliani M, Mei P, Fang R, Leonor T, Rutenberg M, Shimizu F, et al. The histone H3K4  
792 demethylase SMCX links REST target genes to X-linked mental retardation. *Nature*. 2007  
793 May 31;447(7144):601–5.
- 794 38. Paroni G, Bolis M, Zanetti A, Ubezio P, Helin K, Staller P, et al. HER2-positive breast-  
795 cancer cell lines are sensitive to KDM5 inhibition: definition of a gene-expression model  
796 for the selection of sensitive cases. *Oncogene*. 2019 Apr;38(15):2675–89.

- 797 39. Cao J, Liu Z, Cheung WKC, Zhao M, Chen SY, Chan SW, et al. Histone demethylase  
798 RBP2 is critical for breast cancer progression and metastasis. *Cell Rep.* 2014 Mar  
799 13;6(5):868–77.
- 800 40. Tahiliani M, Mei P, Fang R, Leonor T, Rutenberg M, Shimizu F, et al. The histone H3K4  
801 demethylase SMCX links REST target genes to X-linked mental retardation. *Nature.* 2007  
802 May 31;447(7144):601–5.
- 803 41. Moshkin YM, Kan TW, Goodfellow H, Bezstarosti K, Maeda RK, Pilyugin M, et al.  
804 Histone chaperones ASF1 and NAP1 differentially modulate removal of active histone  
805 marks by LID-RPD3 complexes during NOTCH silencing. *Molecular Cell.* 2009 Sep  
806 24;35(6):782–93.
- 807 42. Nishibuchi G, Shibata Y, Hayakawa T, Hayakawa N, Ohtani Y, Sinmyozu K, et al. Physical  
808 and functional interactions between the histone H3K4 demethylase KDM5A and the  
809 nucleosome remodeling and deacetylase (NuRD) complex. *The Journal of Biological  
810 Chemistry.* 2014 Oct 17;289(42):28956–70.
- 811 43. Varier RA, Carrillo de Santa Pau E, van der Groep P, Lindeboom RGH, Matarese F,  
812 Mensinga A, et al. Recruitment of the Mammalian Histone-modifying EMSY Complex to  
813 Target Genes Is Regulated by ZNF131. *J Biol Chem.* 2016 Apr 1;291(14):7313–24.
- 814 44. Ohguchi H, Park PMC, Wang T, Gryder BE, Ogiya D, Kurata K, et al. Lysine Demethylase  
815 5A Is Required for MYC-Driven Transcription in Multiple Myeloma. *Blood Cancer  
816 Discovery.* 2021 Jul 1;2(4):370–87.
- 817 45. Li Q, Shi L, Gui B, Yu W, Wang J, Zhang D, et al. Binding of the JmjC demethylase  
818 JARID1B to LSD1/NuRD suppresses angiogenesis and metastasis in breast cancer cells by  
819 repressing chemokine CCL14. *Cancer Res.* 2011 Nov 1;71(21):6899–908.
- 820 46. Branon TC, Bosch JA, Sanchez AD, Udeshi ND, Svinkina T, Carr SA, et al. Efficient  
821 proximity labeling in living cells and organisms with TurboID. *Nature Biotechnology.* 2018  
822 Oct;36(9):880–7.
- 823 47. Shokri L, Inukai S, Hafner A, Weinand K, Hens K, Vedenko A, et al. A Comprehensive  
824 *Drosophila melanogaster* Transcription Factor Interactome. *Cell reports.* 2019 Apr  
825 16;27(3):955-970.e7.
- 826 48. Uezu A, Kanak DJ, Bradshaw TWA, Soderblom EJ, Catavero CM, Burette AC, et al.  
827 Identification of an elaborate complex mediating postsynaptic inhibition. *Science.* 2016 Sep  
828 9;353(6304):1123–9.
- 829 49. Zhang B, Zhang Y, Liu JL. Highly effective proximate labeling in *Drosophila*. G3  
830 (Bethesda, Md) [Internet]. 2021 May 7 [cited 2021 Jul 26];11(5). Available from:  
831 <http://dx.doi.org/10.1093/g3journal/jkab077>



- 832 50. Szczesniak LM, Bonzerato CG, Wojcikiewicz RJH. Identification of the bok interactome  
833 using proximity labeling. *Frontiers in cell and developmental biology*. 2021 May  
834 31;9:689951.
- 835 51. Mannix KM, Starble RM, Kaufman RS, Cooley L. Proximity labeling reveals novel  
836 interactomes in live *Drosophila* tissue. *Development* [Internet]. 2019 Jul 18 [cited 2020  
837 Nov 17];146(14). Available from: <http://dx.doi.org/10.1242/dev.176644>
- 838 52. Sanchez AD, Branon TC, Cote LE, Papagiannakis A, Liang X, Pickett MA, et al. Proximity  
839 labeling reveals non-centrosomal microtubule-organizing center components required for  
840 microtubule growth and localization. *Current Biology*. 2021 Aug 23;31(16):3586-3600.e11.
- 841 53. Chua XY, Aballo T, Elnemer W, Tran M, Salomon A. Quantitative Interactomics of Lck-  
842 TurboID in Living Human T Cells Unveils T Cell Receptor Stimulation-Induced Proximal  
843 Lck Interactors. *Journal of Proteome Research*. 2021 Jan 1;20(1):715–26.
- 844 54. Cho KF, Branon TC, Udeshi ND, Myers SA, Carr SA, Ting AY. Proximity labeling in  
845 mammalian cells with TurboID and split-TurboID. *Nature Protocols*. 2020  
846 Dec;15(12):3971–99.
- 847 55. Stockhammer A, Benz LS, Harel S, Natalia V, Wiench L, Freund C, et al. When less is  
848 more – Endogenous tagging with TurboID as a tool to study the native interactome of  
849 adaptor protein complexes. *bioRxiv*. 2022 Jan 1;2021.11.19.469212.
- 850 56. Drelon C, Rogers MF, Belalcazar HM, Secombe J. The histone demethylase KDM5  
851 controls developmental timing in *Drosophila* by promoting prothoracic gland endocycles.  
852 *Development*. 2019 Dec 20;146(24):dev182568.
- 853 57. Artan M, Barratt S, Flynn SM, Begum F, Skehel M, Nicolas A, et al. Interactome analysis  
854 of *Caenorhabditis elegans* synapses by TurboID-based proximity labeling. *Journal of*  
855 *Biological Chemistry*. 2021 Sep 1;297(3):101094.
- 856 58. Hu S, Ouyang J, Zheng G, Lu Y, Zhu Q, Wang B, et al. Identification of mutant p53-  
857 specific proteins interaction network using TurboID-based proximity labeling. *Biochemical*  
858 *and Biophysical Research Communications*. 2022 Jul 30;615:163–71.
- 859 59. Chevalier B, Baatallah N, Najm M, Castanier S, Jung V, Pranke I, et al. Differential CFTR-  
860 Interactome Proximity Labeling Procedures Identify Enrichment in Multiple SLC  
861 Transporters. *Int J Mol Sci*. 2022 Aug 11;23(16):8937.
- 862 60. Uçkun E, Wolfstetter G, Anthonydhason V, Sukumar SK, Umapathy G, Molander L, et al.  
863 In vivo Profiling of the Alk Proximitome in the Developing *Drosophila* Brain. *Journal of*  
864 *Molecular Biology*. 2021 Nov 19;433(23):167282.
- 865 61. Burmistrz M, Krakowski K, Krawczyk-Balska A. RNA-Targeting CRISPR-Cas Systems  
866 and Their Applications. *Int J Mol Sci*. 2020 Feb 7;21(3):E1122.

- 867 62. Szklarczyk D, Gable AL, Nastou KC, Lyon D, Kirsch R, Pyysalo S, et al. The STRING  
868 database in 2021: customizable protein-protein networks, and functional characterization of  
869 user-uploaded gene/measurement sets. *Nucleic Acids Res.* 2021 Jan 8;49(D1):D605–12.
- 870 63. Shannon P, Markiel A, Ozier O, Baliga NS, Wang JT, Ramage D, et al. Cytoscape: a  
871 software environment for integrated models of biomolecular interaction networks. *Genome*  
872 *Research.* 2003 Nov;13(11):2498–504.
- 873 64. Kaushal A, Dorier J, Wang B, Mohana G, Taschner M, Cousin P, et al. Essential role of  
874 Cp190 in physical and regulatory boundary formation. *Science Advances.* 2022 May  
875 13;8(19):eabl8834.
- 876 65. Ramírez F, Bhardwaj V, Arrigoni L, Lam KC, Grüning BA, Villaveces J, et al. High-  
877 resolution TADs reveal DNA sequences underlying genome organization in flies. *Nature*  
878 *Communications.* 2018 Jan 15;9(1):189.
- 879 66. Sabirov M, Popovich A, Boyko K, Nikolaeva A, Kyrchanova O, Maksimenko O, et al.  
880 Mechanisms of CP190 Interaction with Architectural Proteins in *Drosophila Melanogaster*.  
881 *International Journal of Molecular Sciences* [Internet]. 2021 Nov 17 [cited 2021 Dec  
882 8];22(22). Available from: <http://dx.doi.org/10.3390/ijms222212400>
- 883 67. Melnikova LS, Molodina VV, Kostyuchenko MV, Georgiev PG, Golovnin AK. The BEAF-  
884 32 Protein Directly Interacts with Z4/putzig and Chriz/Chromator Proteins in *Drosophila*  
885 *melanogaster*. *Doklady Biochemistry and biophysics.* 2021 May;498(1):184–9.
- 886 68. Chathoth KT, Mikheeva LA, Crevel G, Wolfe JC, Hunter I, Beckett-Doyle S, et al. The role  
887 of insulators and transcription in 3D chromatin organization of flies. *Genome Research*  
888 [Internet]. 2022 Mar 30 [cited 2022 Apr 20]; Available from:  
889 <http://dx.doi.org/10.1101/gr.275809.121>
- 890 69. Schwartz YB, Cavalli G. Three-Dimensional Genome Organization and Function in  
891 *Drosophila*. *Genetics.* 2017 Jan;205(1):5–24.
- 892 70. He R, Kidder BL. H3K4 demethylase KDM5B regulates global dynamics of transcription  
893 elongation and alternative splicing in embryonic stem cells. *Nucleic Acids Research.* 2017  
894 Jun 20;45(11):6427–41.
- 895 71. Hinohara K, Wu HJ, Vigneau S, McDonald TO, Igarashi KJ, Yamamoto KN, et al. KDM5  
896 Histone Demethylase Activity Links Cellular Transcriptomic Heterogeneity to Therapeutic  
897 Resistance. *Cancer Cell.* 2018 Dec 10;34(6):939-953.e9.
- 898 72. Liu X, Greer C, Secombe J. KDM5 interacts with Foxo to modulate cellular levels of  
899 oxidative stress. *PLoS Genetics.* 2014 Oct 16;10(10):e1004676.
- 900 73. Chen X, Yin X, Li J, Wu Z, Qi Y, Wang X, et al. Structures of the human Mediator and  
901 Mediator-bound preinitiation complex. *Science.* 2021 Jun 4;372(6546):eabg0635.

- 902 74. Zou Z, Ohta T, Miura F, Oki S. ChIP-Atlas 2021 update: a data-mining suite for exploring  
903 epigenomic landscapes by fully integrating ChIP-seq, ATAC-seq and Bisulfite-seq data.  
904 *Nucleic Acids Research*. 2022 Jul 5;50(W1):W175–82.
- 905 75. Liu X, Secombe J. The Histone Demethylase KDM5 Activates Gene Expression by  
906 Recognizing Chromatin Context through Its PHD Reader Motif. *Cell reports*. 2015 Dec  
907 15;13(10):2219–31.
- 908 76. Hu Y, Flockhart I, Vinayagam A, Bergwitz C, Berger B, Perrimon N, et al. An integrative  
909 approach to ortholog prediction for disease-focused and other functional studies. *BMC*  
910 *Bioinformatics*. 2011 Aug 31;12:357.
- 911 77. Hinohara K, Wu HJ, Vigneau S, McDonald TO, Igarashi KJ, Yamamoto KN, et al. KDM5  
912 Histone Demethylase Activity Links Cellular Transcriptomic Heterogeneity to Therapeutic  
913 Resistance. *Cancer Cell*. 2018 Dec;34(6):939-953.e9.
- 914 78. Spain MM, Caruso JA, Swaminathan A, Pile LA. Drosophila SIN3 isoforms interact with  
915 distinct proteins and have unique biological functions. *J Biol Chem*. 2010 Aug  
916 27;285(35):27457–67.
- 917 79. Poeta L, Padula A, Lioi MB, van Bokhoven H, Miano MG. Analysis of a set of KDM5C  
918 regulatory genes mutated in neurodevelopmental disorders identifies temporal coexpression  
919 brain signatures. *Genes* [Internet]. 2021 Jul 18 [cited 2021 Oct 21];12(7). Available from:  
920 <http://dx.doi.org/10.3390/genes12071088>
- 921 80. Gonçalves TF, Gonçalves AP, Fintelman Rodrigues N, dos Santos JM, Pimentel MMG,  
922 Santos-Rebouças CB. KDM5C mutational screening among males with intellectual  
923 disability suggestive of X-Linked inheritance and review of the literature. *European Journal*  
924 *of Medical Genetics*. 2014 Mar;57(4):138–44.
- 925 81. Brookes E, Laurent B, Öunap K, Carroll R, Moeschler JB, Field M, et al. Mutations in the  
926 intellectual disability gene KDM5C reduce protein stability and demethylase activity.  
927 *Human Molecular Genetics*. 2015 May 15;24(10):2861–72.
- 928 82. Hatch HAM, Secombe J. Molecular and cellular events linking variants in the histone  
929 demethylase KDM5C to the intellectual disability disorder Claes-Jensen syndrome. *The*  
930 *FEBS Journal* [Internet]. 2021 Sep 18 [cited 2021 Oct 19]; Available from:  
931 <http://dx.doi.org/10.1111/febs.16204>
- 932 83. Abrahams BS, Arking DE, Campbell DB, Mefford HC, Morrow EM, Weiss LA, et al.  
933 SFARI Gene 2.0: a community-driven knowledgebase for the autism spectrum disorders  
934 (ASDs). *Mol Autism*. 2013 Oct 3;4(1):36.
- 935 84. Gonzalez-Mantilla AJ, Moreno-De-Luca A, Ledbetter DH, Martin CL. A Cross-Disorder  
936 Method to Identify Novel Candidate Genes for Developmental Brain Disorders. *JAMA*  
937 *Psychiatry*. 2016 Mar;73(3):275–83.

- 938 85. Lin W, Cao J, Liu J, Beshiri ML, Fujiwara Y, Francis J, et al. Loss of the retinoblastoma  
939 binding protein 2 (RBP2) histone demethylase suppresses tumorigenesis in mice lacking  
940 Rb1 or Men1. *Proc Natl Acad Sci U S A*. 2011 Aug 16;108(33):13379–86.
- 941 86. Kidder BL, Hu G, Zhao K. KDM5B focuses H3K4 methylation near promoters and  
942 enhancers during embryonic stem cell self-renewal and differentiation. *Genome Biol*.  
943 2014;15(2):R32.
- 944 87. Eggert H, Gortchakov A, Saumweber H. Identification of the *Drosophila* interband-specific  
945 protein Z4 as a DNA-binding zinc-finger protein determining chromosomal structure.  
946 *Journal of Cell Science*. 2004 Aug 15;117(Pt 18):4253–64.
- 947 88. Shalaby NA, Sayed R, Zhang Q, Scoggin S, Eliazar S, Rothenfluh A, et al. Systematic  
948 discovery of genetic modulation by Jumonji histone demethylases in *Drosophila*. *Scientific*  
949 *Reports*. 2017 Jul 12;7(1):5240.
- 950 89. Maharjan M, McKowen JK, Hart CM. Overlapping but Distinct Sequences Play Roles in  
951 the Insulator and Promoter Activities of the *Drosophila* BEAF-Dependent scs' Insulator.  
952 *Genetics*. 2020 Aug;215(4):1003–12.
- 953 90. Yin J wen, Wang G. The Mediator complex: a master coordinator of transcription and cell  
954 lineage development. *Development*. 2014 Mar;141(5):977–87.
- 955 91. Gala K, Li Q, Sinha A, Razavi P, Dorso M, Sanchez-Vega F, et al. KMT2C mediates the  
956 estrogen dependence of breast cancer through regulation of ER $\alpha$  enhancer function.  
957 *Oncogene*. 2018 Aug;37(34):4692–710.
- 958 92. Ferreyra Solari NE, Belforte FS, Canedo L, Videla-Richardson GA, Espinosa JM, Rossi M,  
959 et al. The NSL Chromatin-Modifying Complex Subunit KANSL2 Regulates Cancer Stem-  
960 like Properties in Glioblastoma That Contribute to Tumorigenesis. *Cancer Res*. 2016 Sep  
961 15;76(18):5383–94.
- 962 93. Mittal P, Roberts CWM. The SWI/SNF complex in cancer - biology, biomarkers and  
963 therapy. *Nat Rev Clin Oncol*. 2020 Jul;17(7):435–48.
- 964 94. Wanior M, Krämer A, Knapp S, Joerger AC. Exploiting vulnerabilities of SWI/SNF  
965 chromatin remodelling complexes for cancer therapy. *Oncogene*. 2021 May;40(21):3637–  
966 54.
- 967 95. Singh M, Bacolla A, Chaudhary S, Hunt CR, Pandita S, Chauhan R, et al. Histone  
968 Acetyltransferase MOF Orchestrates Outcomes at the Crossroad of Oncogenesis, DNA  
969 Damage Response, Proliferation, and Stem Cell Development. *Mol Cell Biol*. 2020 Aug  
970 28;40(18):e00232-20.
- 971 96. Cao J, Liu Z, Cheung WKC, Zhao M, Chen SY, Chan SW, et al. Histone demethylase  
972 RBP2 is critical for breast cancer progression and metastasis. *Cell Rep*. 2014 Mar  
973 13;6(5):868–77.

- 974 97. Cui J, Germer K, Wu T, Wang J, Luo J, Wang S chun, et al. Cross-talk between HER2 and  
975 MED1 regulates tamoxifen resistance of human breast cancer cells. *Cancer Res.* 2012 Nov  
976 1;72(21):5625–34.
- 977 98. Aguilan JT, Kulej K, Sidoli S. Guide for protein fold change and p-value calculation for  
978 non-experts in proteomics. *Mol Omics.* 2020 Dec 1;16(6):573–82.
- 979 99. Wu T, Hu E, Xu S, Chen M, Guo P, Dai Z, et al. clusterProfiler 4.0: A universal enrichment  
980 tool for interpreting omics data. *Innovation (Cambridge (Mass)).* 2021 Aug 28;2(3):100141.
- 981 100. Yu G, He QY. ReactomePA: an R/Bioconductor package for reactome pathway analysis  
982 and visualization. *Molecular Biosystems.* 2016 Feb;12(2):477–9.
- 983 101. Blighe K, Rana S, Turkes E, Ostendorf B, Grioni A, Lewis M. EnhancedVolcano:  
984 Publication-ready volcano plots with enhanced colouring and labeling [Internet].  
985 Bioconductor version: Release (3.16); 2023 [cited 2023 Jan 6]. Available from:  
986 <https://bioconductor.org/packages/EnhancedVolcano/>
- 987 102. Ramírez F, Ryan DP, Grüning B, Bhardwaj V, Kilpert F, Richter AS, et al. deepTools2: a  
988 next generation web server for deep-sequencing data analysis. *Nucleic Acids Research.*  
989 2016 Jul 8;44(W1):W160–5.
- 990 103. Ramírez F, Bhardwaj V, Arrigoni L, Lam KC, Grüning BA, Villaveces J, et al. High-  
991 resolution TADs reveal DNA sequences underlying genome organization in flies. *Nat*  
992 *Commun.* 2018 Jan 15;9(1):189.
- 993

# Fig1

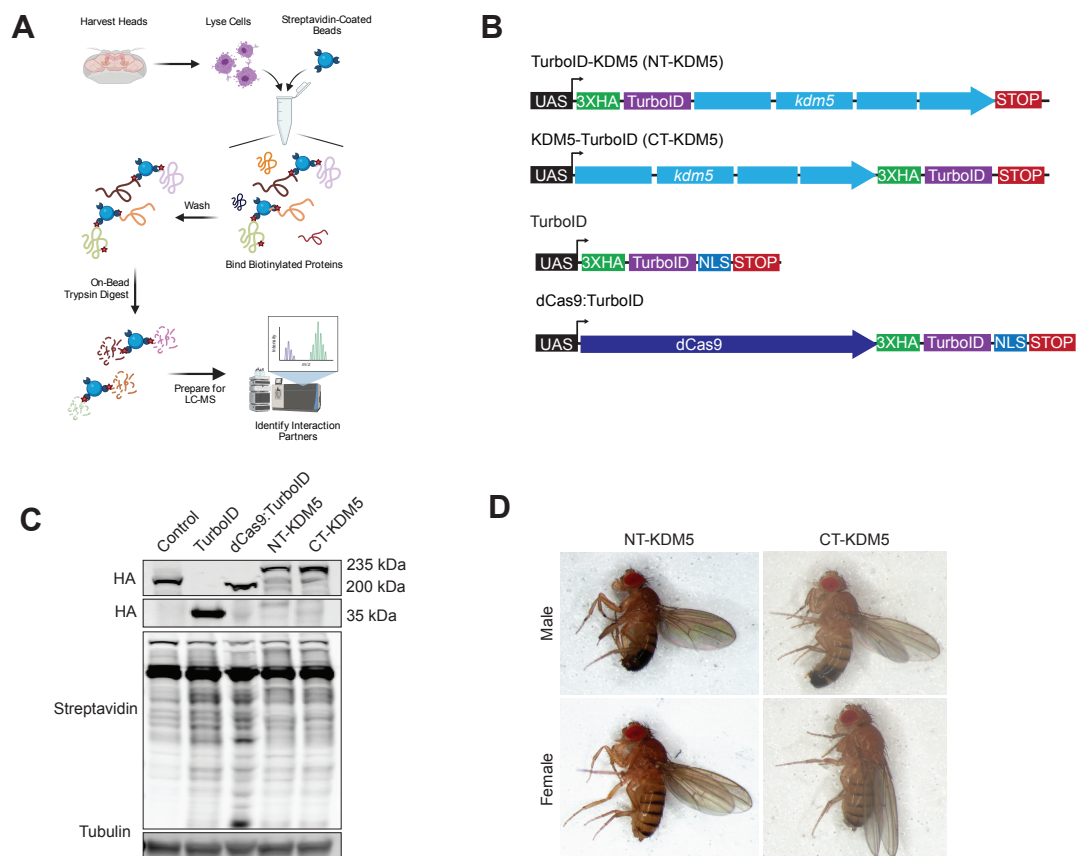

# Fig 2

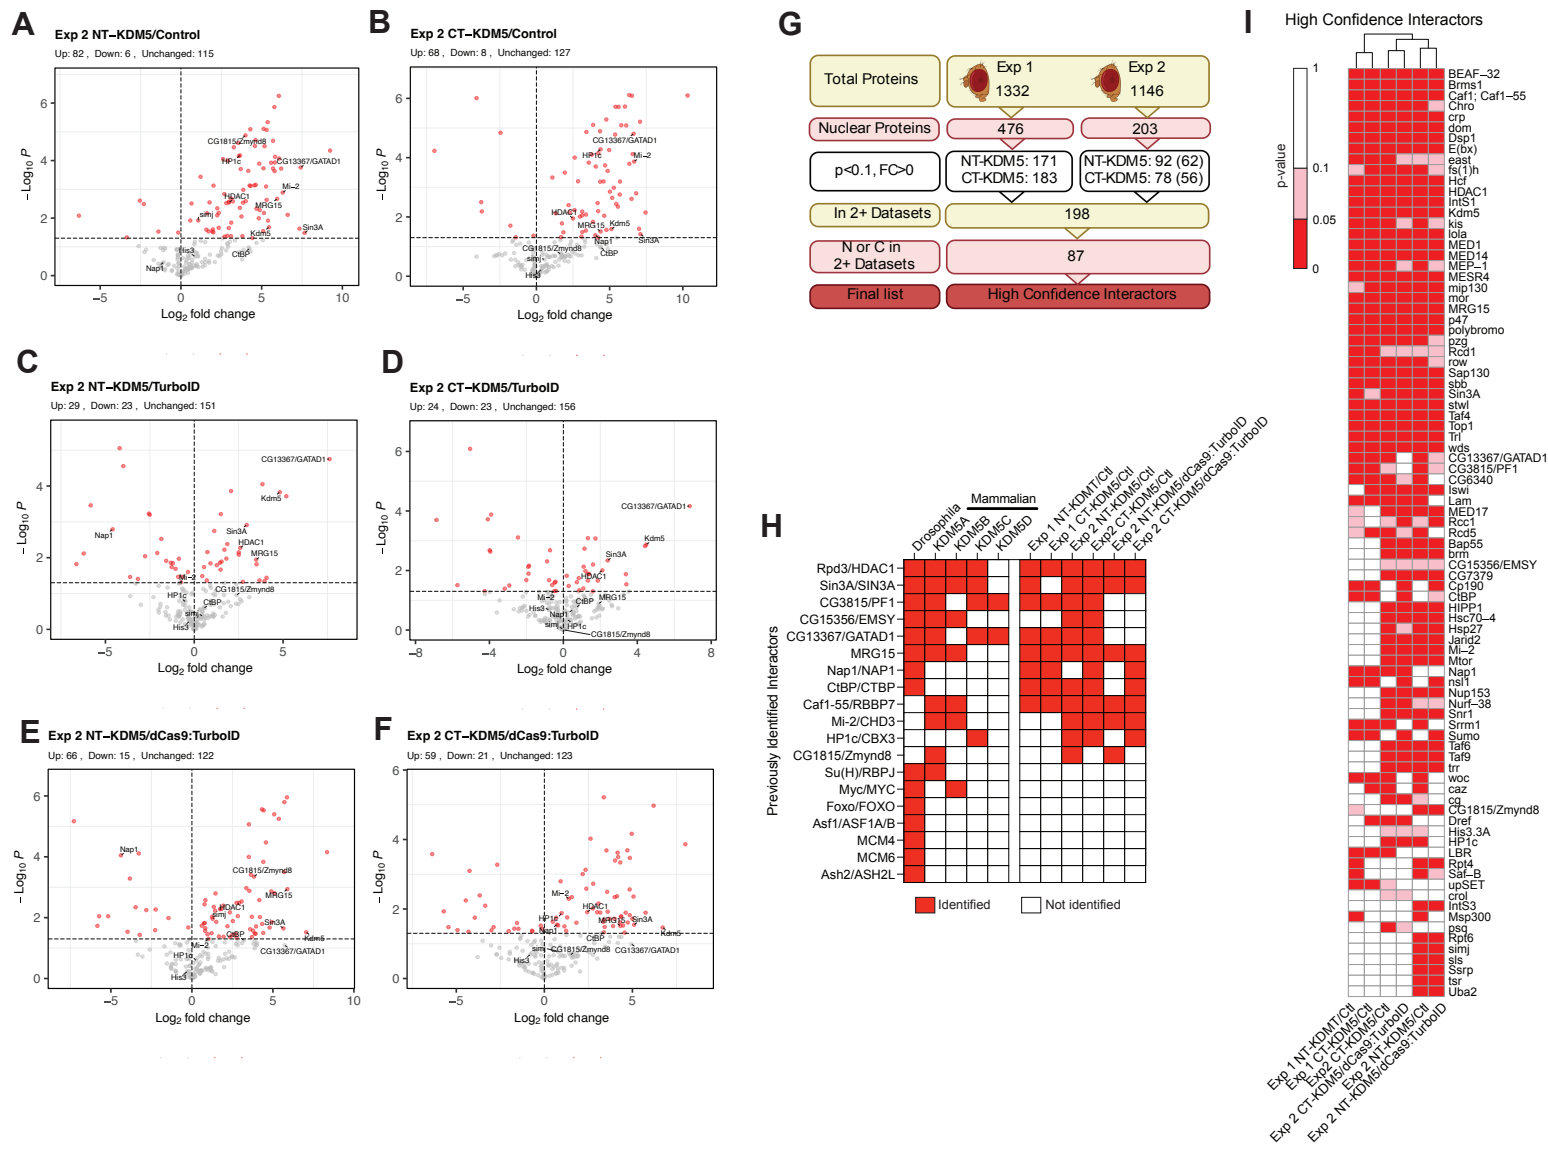

# Fig 3

A

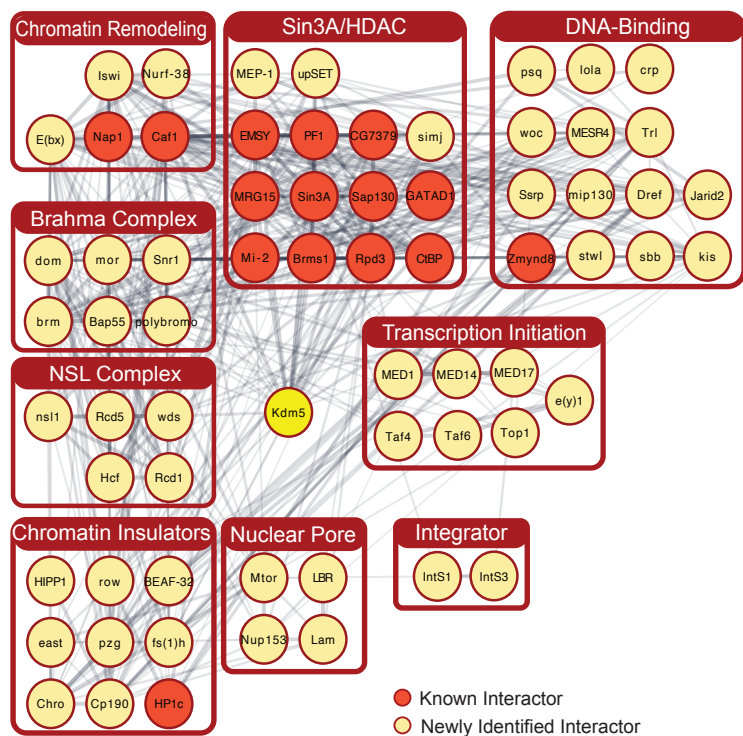

B

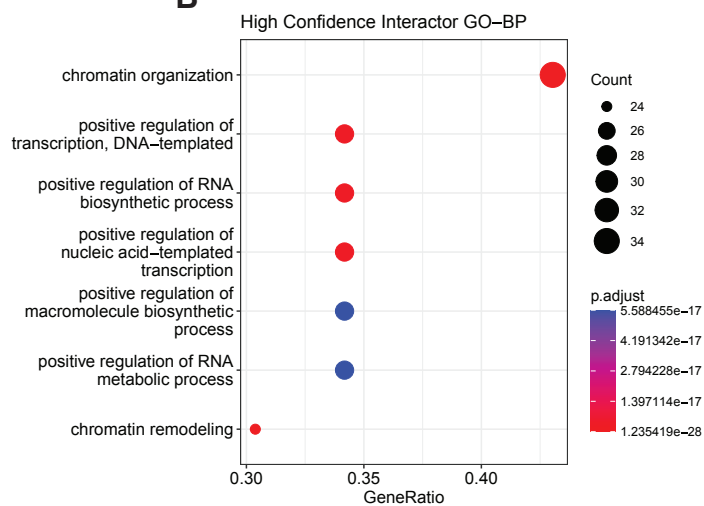

C

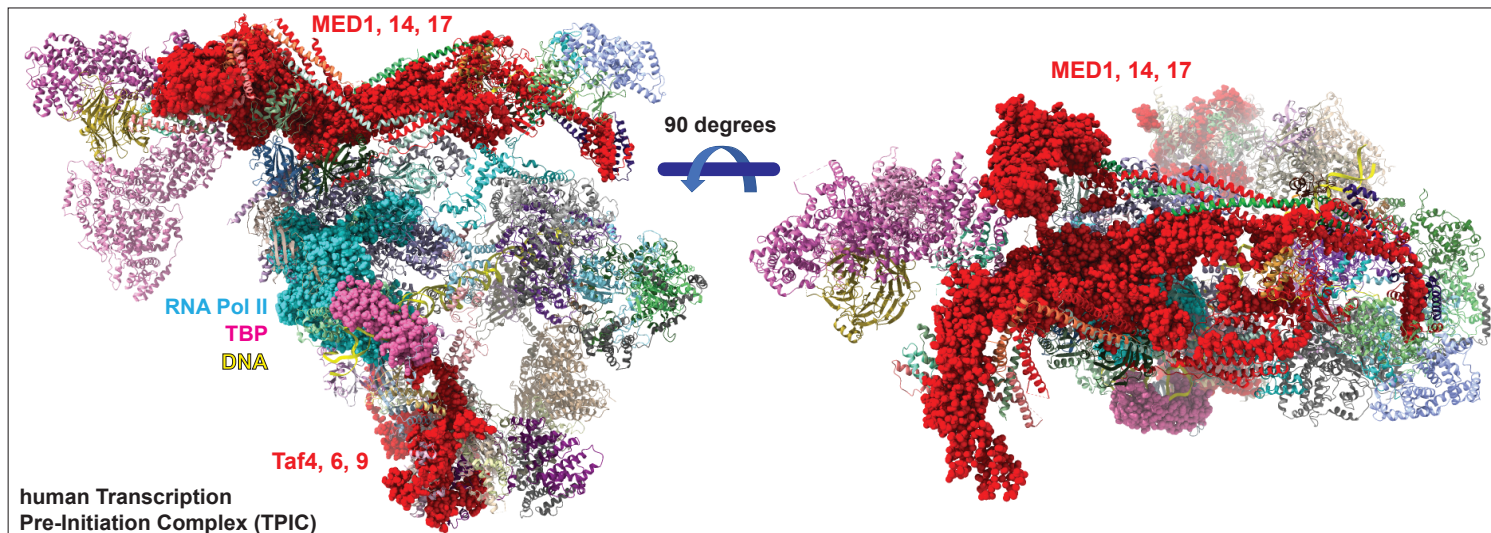



# Fig 4

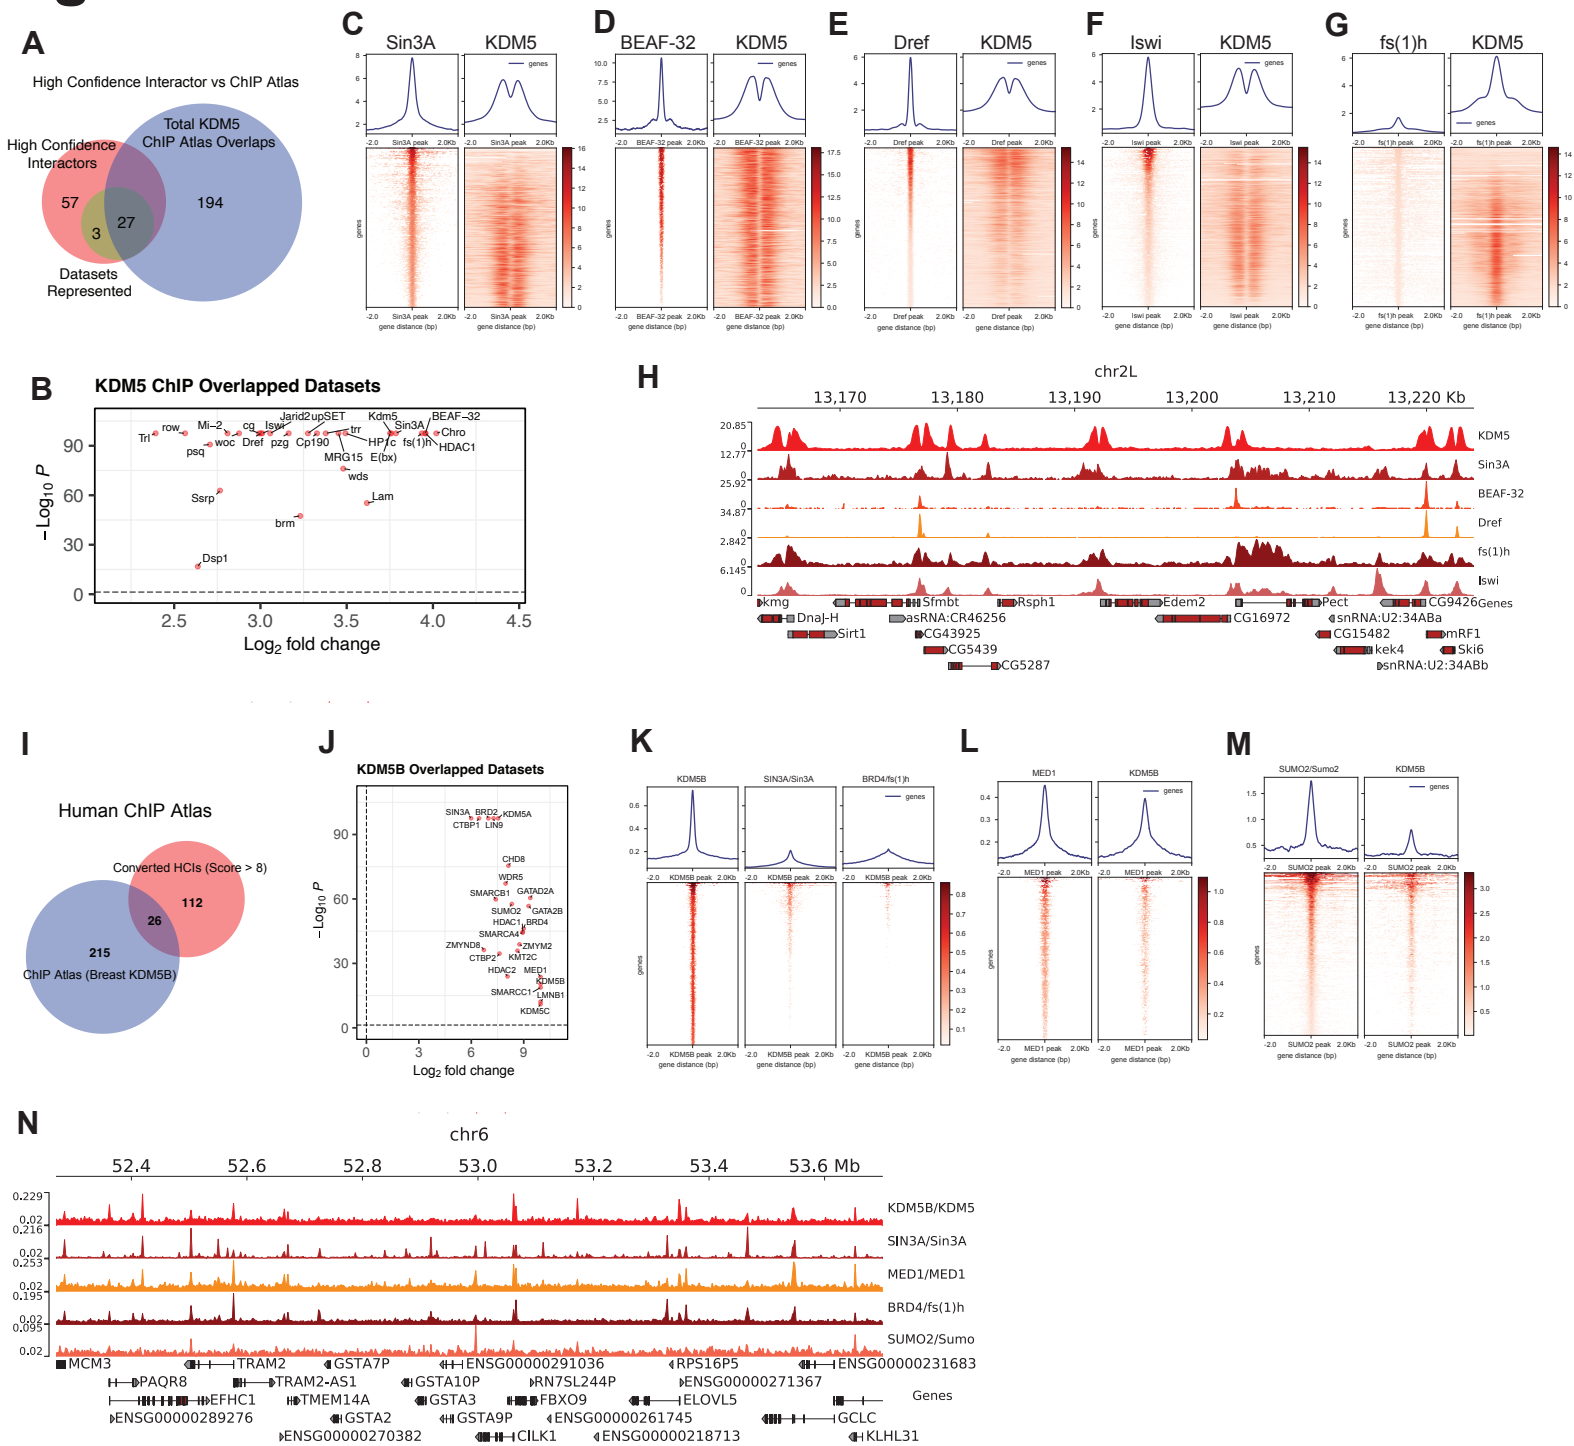

# Fig 5

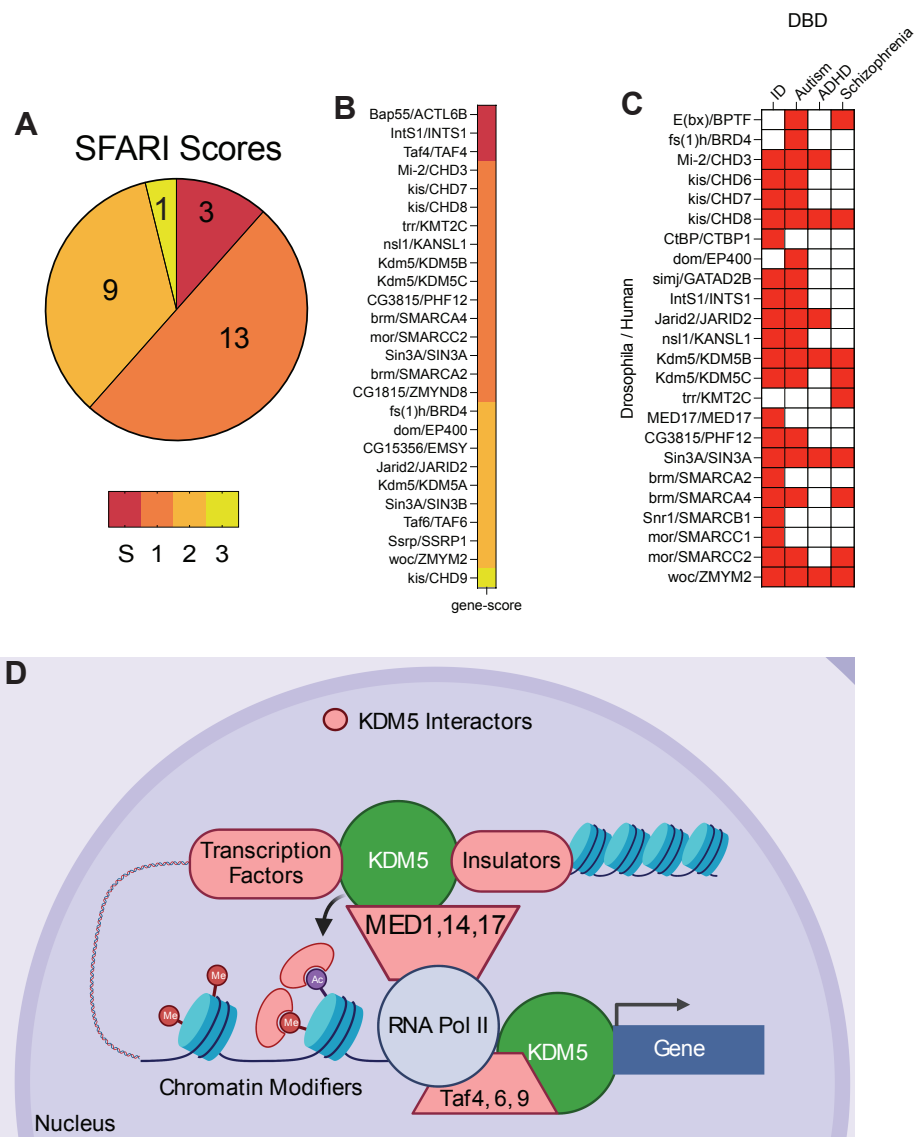

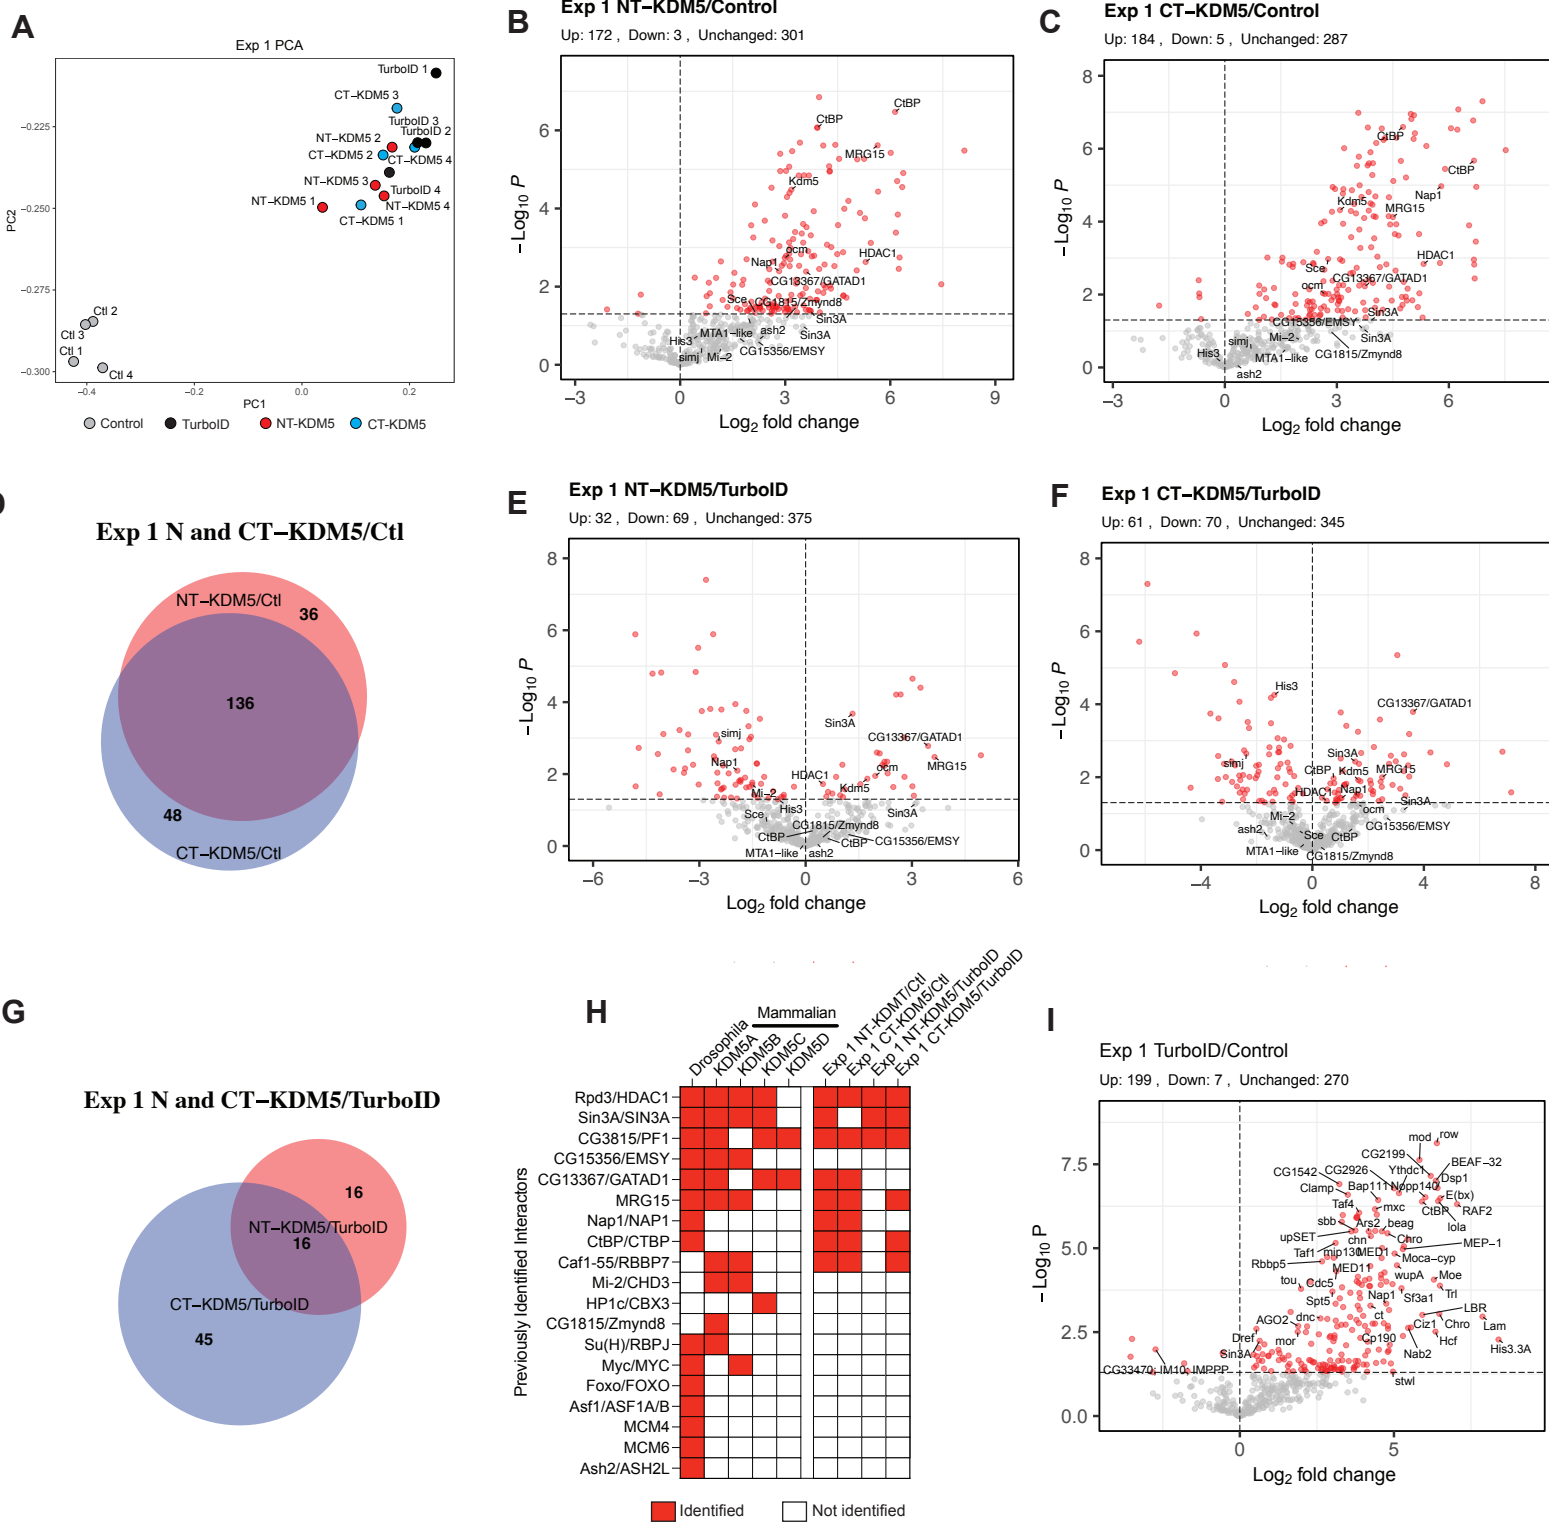

**A**

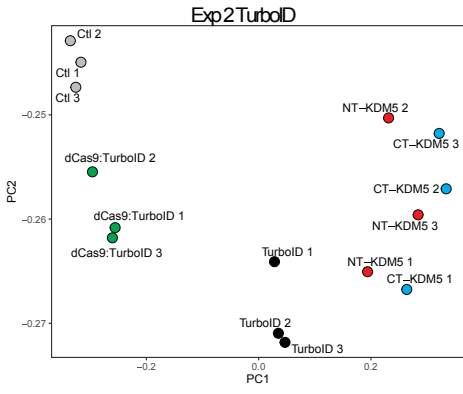

**B** Exp 2 dCas9:TurboID/TurboID

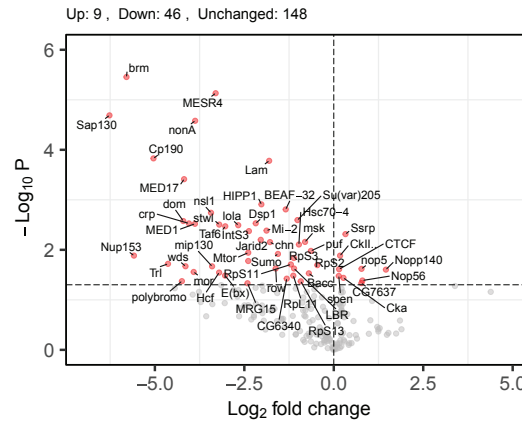

**C** Exp 2 dCas9:TurboID/Control

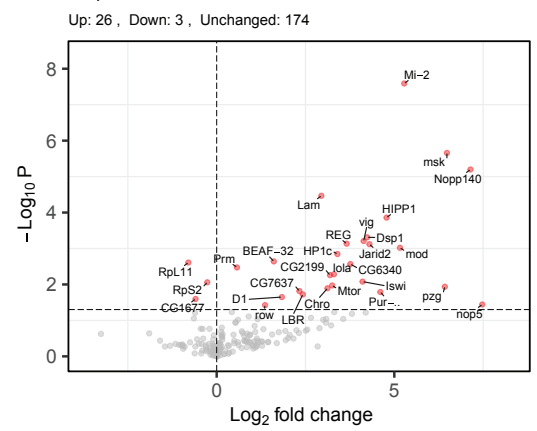

**D**

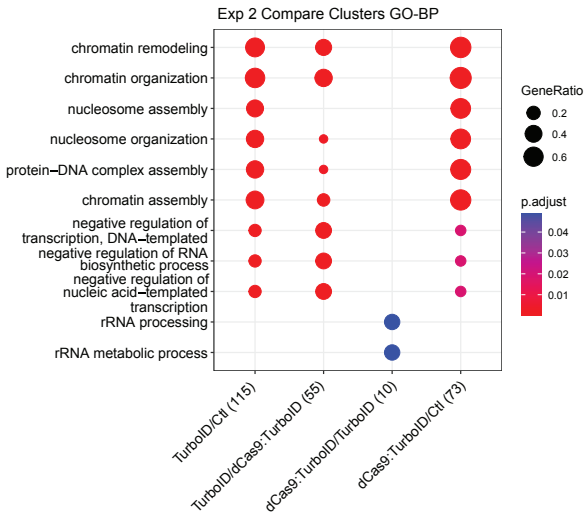

**E**

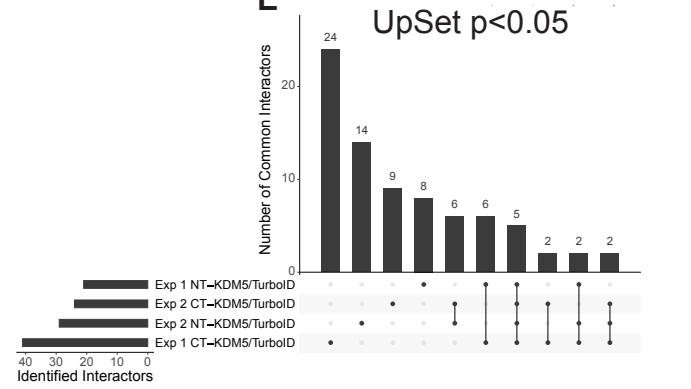

**F**

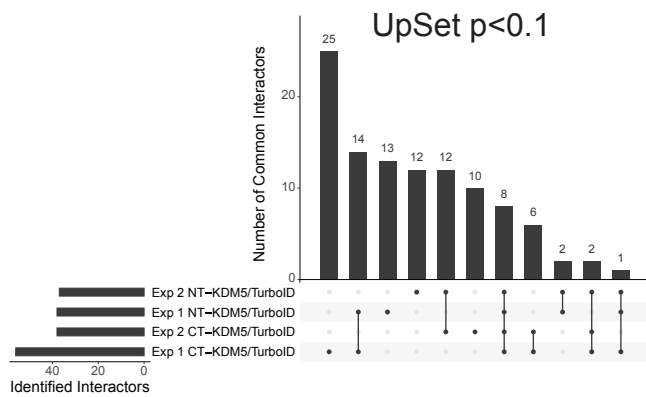

**G**

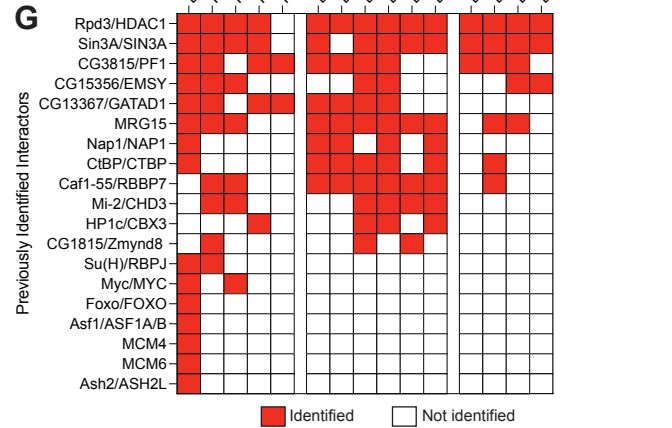

*Drosophila melanogaster*

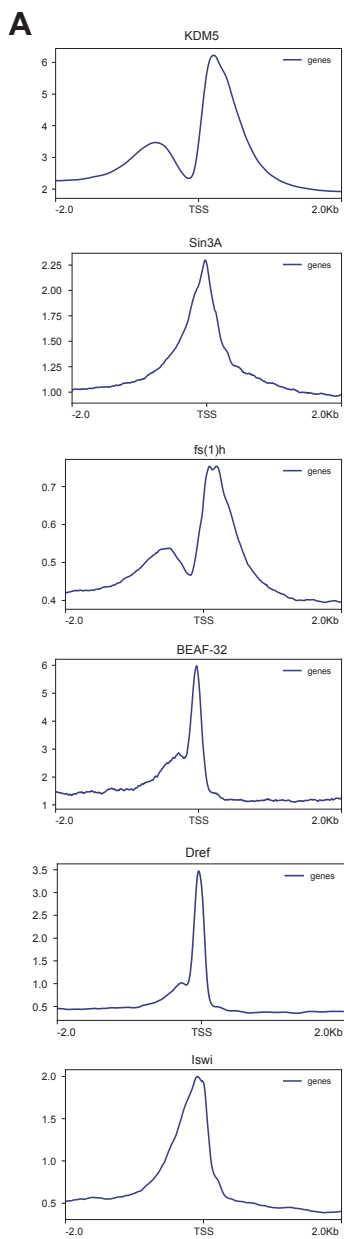

*Homo sapiens*

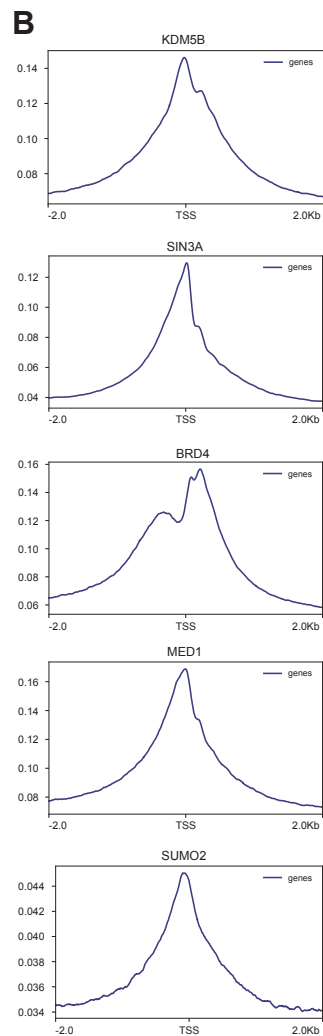

Source: http://biorxiv.org/content/10.1101/2022.11.20.517232v2.full.pdf
